# Supplementary material for: Doubly N-Confused and Ring-Contracted [24]Hexaphyrin Pd-Complexes: Stable Antiaromatic N-Confused Expanded Porphyrins
Source: Research Square preprint supplement (doi:10.21203/rs.3.rs-2643897/v1), 2023-03-20

## checkCIF/PLATON report

Structure factors have been supplied for datablock(s) exp\_2188\_sq\_sq

THIS REPORT IS FOR GUIDANCE ONLY. IF USED AS PART OF A REVIEW PROCEDURE FOR PUBLICATION, IT SHOULD NOT REPLACE THE EXPERTISE OF AN EXPERIENCED CRYSTALLOGRAPHIC REFEREE.

No syntax errors found.      CIF dictionary      Interpreting this report

### Datablock: exp\_2188\_sq\_sq

---

Bond precision:      C-C = 0.0103 Å      Wavelength=1.54184

Cell:                      a=15.8106(14)                      b=11.2102(10)                      c=17.812(3)  
                              alpha=90                      beta=105.385(11)                      gamma=90

Temperature:              100 K

|                        | Calculated                  | Reported        |
|------------------------|-----------------------------|-----------------|
| Volume                 | 3043.9(7)                   | 3043.8(6)       |
| Space group            | P 21/c                      | P 1 21/c 1      |
| Hall group             | -P 2ybc                     | -P 2ybc         |
| Moiety formula         | C64 H54 N6 O Pd [+ solvent] | C64 H54 N6 O Pd |
| Sum formula            | C64 H54 N6 O Pd [+ solvent] | C64 H54 N6 O Pd |
| Mr                     | 1029.53                     | 1029.53         |
| Dx, g cm <sup>-3</sup> | 1.123                       | 1.123           |
| Z                      | 2                           | 2               |
| Mu (mm <sup>-1</sup> ) | 2.781                       | 2.781           |
| F000                   | 1068.0                      | 1068.0          |
| F000'                  | 1070.90                     |                 |
| h, k, lmax             | 18, 13, 21                  | 18, 13, 21      |
| Nref                   | 5380                        | 5374            |
| Tmin, Tmax             | 0.602, 0.757                | 0.540, 1.000    |
| Tmin'                  | 0.546                       |                 |

Correction method= # Reported T Limits: Tmin=0.540 Tmax=1.000  
AbsCorr = MULTI-SCAN

Data completeness= 0.999

Theta(max)= 66.587

R(reflections)= 0.0900( 3484)

wR2(reflections)=  
0.2829( 5374)

S = 1.054

Npar= 377

---

The following ALERTS were generated. Each ALERT has the format

**test-name\_ALERT\_alert-type\_alert-level.**

Click on the hyperlinks for more details of the test.

---

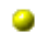

### Alert level C

|                   |                                                  |         |        |
|-------------------|--------------------------------------------------|---------|--------|
| PLAT084_ALERT_3_C | High wR2 Value (i.e. > 0.25) .....               | 0.28    | Report |
| PLAT213_ALERT_2_C | Atom C27 has ADP max/min Ratio .....             | 3.6     | prolat |
| PLAT220_ALERT_2_C | NonSolvent Resd 1 C Ueq(max)/Ueq(min) Range      | 3.2     | Ratio  |
| PLAT230_ALERT_2_C | Hirshfeld Test Diff for C9 --C10                 | 5.6     | s.u.   |
| PLAT241_ALERT_2_C | High 'MainMol' Ueq as Compared to Neighbors of   | C24     | Check  |
| PLAT242_ALERT_2_C | Low 'MainMol' Ueq as Compared to Neighbors of    | C23     | Check  |
| PLAT250_ALERT_2_C | Large U3/U1 Ratio for Average U(i,j) Tensor .... | 2.2     | Note   |
| PLAT342_ALERT_3_C | Low Bond Precision on C-C Bonds .....            | 0.01033 | Ang.   |
| PLAT906_ALERT_3_C | Large K Value in the Analysis of Variance .....  | 4.599   | Check  |
| PLAT906_ALERT_3_C | Large K Value in the Analysis of Variance .....  | 2.193   | Check  |
| PLAT911_ALERT_3_C | Missing FCF Refl Between Thmin & STh/L= 0.595    | 6       | Report |

---

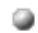

### Alert level G

|                   |                                                  |       |        |
|-------------------|--------------------------------------------------|-------|--------|
| PLAT003_ALERT_2_G | Number of Uiso or Uij Restrained non-H Atoms ... | 9     | Report |
| PLAT072_ALERT_2_G | SHELXL First Parameter in WGHT Unusually Large   | 0.15  | Report |
| PLAT177_ALERT_4_G | The CIF-Embedded .res File Contains DELU Records | 1     | Report |
| PLAT186_ALERT_4_G | The CIF-Embedded .res File Contains ISOR Records | 1     | Report |
| PLAT300_ALERT_4_G | Atom Site Occupancy of N3 Constrained at         | 0.5   | Check  |
| PLAT300_ALERT_4_G | Atom Site Occupancy of N4 Constrained at         | 0.5   | Check  |
| PLAT300_ALERT_4_G | Atom Site Occupancy of O1A Constrained at        | 0.25  | Check  |
| PLAT300_ALERT_4_G | Atom Site Occupancy of O2A Constrained at        | 0.25  | Check  |
| PLAT300_ALERT_4_G | Atom Site Occupancy of C32 Constrained at        | 0.5   | Check  |
| PLAT300_ALERT_4_G | Atom Site Occupancy of C32A Constrained at       | 0.5   | Check  |
| PLAT301_ALERT_3_G | Main Residue Disorder .....(Resd 1 )             | 8%    | Note   |
| PLAT432_ALERT_2_G | Short Inter X...Y Contact O1A ..C13              | 2.89  | Ang.   |
|                   | x, 3/2-y, 1/2+z =                                | 4_576 | Check  |
| PLAT432_ALERT_2_G | Short Inter X...Y Contact O1A ..C7               | 2.94  | Ang.   |
|                   | x, 3/2-y, 1/2+z =                                | 4_576 | Check  |
| PLAT432_ALERT_2_G | Short Inter X...Y Contact O1A ..C8               | 2.98  | Ang.   |
|                   | x, 3/2-y, 1/2+z =                                | 4_576 | Check  |
| PLAT432_ALERT_2_G | Short Inter X...Y Contact O2A ..C9               | 2.91  | Ang.   |
|                   | 1-x, -1/2+y, 1/2-z =                             | 2_645 | Check  |
| PLAT432_ALERT_2_G | Short Inter X...Y Contact O2A ..C14              | 2.93  | Ang.   |
|                   | 1-x, -1/2+y, 1/2-z =                             | 2_645 | Check  |
| PLAT432_ALERT_2_G | Short Inter X...Y Contact O2A ..C8               | 3.00  | Ang.   |
|                   | 1-x, -1/2+y, 1/2-z =                             | 2_645 | Check  |
| PLAT606_ALERT_4_G | Solvent Accessible VOID(S) in Structure .....    | !     | Info   |
| PLAT793_ALERT_4_G | Model has Chirality at C32 (Centro SPGR)         | S     | Verify |
| PLAT860_ALERT_3_G | Number of Least-Squares Restraints .....         | 77    | Note   |
| PLAT869_ALERT_4_G | ALERTS Related to the Use of SQUEEZE Suppressed  | !     | Info   |
| PLAT909_ALERT_3_G | Percentage of I>2sig(I) Data at Theta(Max) Still | 36%   | Note   |
| PLAT941_ALERT_3_G | Average HKL Measurement Multiplicity .....       | 1.9   | Low    |
| PLAT978_ALERT_2_G | Number C-C Bonds with Positive Residual Density. | 0     | Info   |
| PLAT992_ALERT_5_G | Repd & Actual _reflns_number_gt Values Differ by | 4     | Check  |

---

0 **ALERT level A** = Most likely a serious problem - resolve or explain

0 **ALERT level B** = A potentially serious problem, consider carefully

11 **ALERT level C** = Check. Ensure it is not caused by an omission or oversight

25 **ALERT level G** = General information/check it is not something unexpected

0 ALERT type 1 CIF construction/syntax error, inconsistent or missing data

15 ALERT type 2 Indicator that the structure model may be wrong or deficient

9 ALERT type 3 Indicator that the structure quality may be low

11 ALERT type 4 Improvement, methodology, query or suggestion

1 ALERT type 5 Informative message, check

---

It is advisable to attempt to resolve as many as possible of the alerts in all categories. Often the minor alerts point to easily fixed oversights, errors and omissions in your CIF or refinement strategy, so attention to these fine details can be worthwhile. In order to resolve some of the more serious problems it may be necessary to carry out additional measurements or structure refinements. However, the purpose of your study may justify the reported deviations and the more serious of these should normally be commented upon in the discussion or experimental section of a paper or in the "special\_details" fields of the CIF. checkCIF was carefully designed to identify outliers and unusual parameters, but every test has its limitations and alerts that are not important in a particular case may appear. Conversely, the absence of alerts does not guarantee there are no aspects of the results needing attention. It is up to the individual to critically assess their own results and, if necessary, seek expert advice.

### **Publication of your CIF in IUCr journals**

A basic structural check has been run on your CIF. These basic checks will be run on all CIFs submitted for publication in IUCr journals (*Acta Crystallographica*, *Journal of Applied Crystallography*, *Journal of Synchrotron Radiation*); however, if you intend to submit to *Acta Crystallographica Section C* or *E* or *IUCrData*, you should make sure that full publication checks are run on the final version of your CIF prior to submission.

### **Publication of your CIF in other journals**

Please refer to the *Notes for Authors* of the relevant journal for any special instructions relating to CIF submission.

---

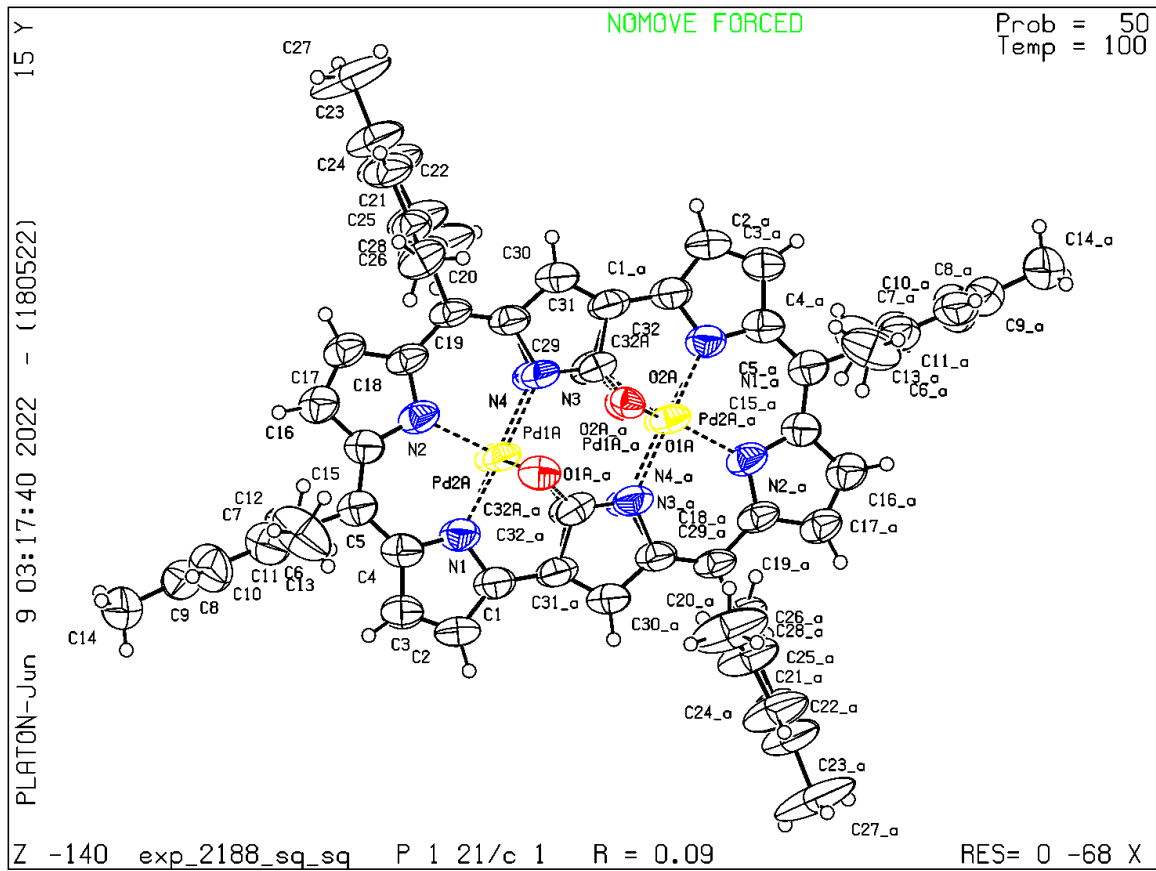

Supplement: Supplementary file 1 [file 011c12b95cafabaa343e3424.pdf]
