# Supplementary material for: Doubly N-Confused and Ring-Contracted [24]Hexaphyrin Pd-Complexes: Stable Antiaromatic N-Confused Expanded Porphyrins
Source: Research Square preprint supplement (doi:10.21203/rs.3.rs-2643897/v1), 2023-03-20

---

The following ALERTS were generated. Each ALERT has the format

**test-name\_ALERT\_alert-type\_alert-level.**

Click on the hyperlinks for more details of the test.

---

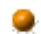

#### Alert level B

|                   |                          |                  |           |
|-------------------|--------------------------|------------------|-----------|
| PLAT971_ALERT_2_B | Check Calcd Resid. Dens. | 1.05Ang From Pd1 | 2.60 eA-3 |
| PLAT971_ALERT_2_B | Check Calcd Resid. Dens. | 1.05Ang From Pd1 | 2.52 eA-3 |

---

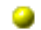

#### Alert level C

|                   |                                                |                  |              |
|-------------------|------------------------------------------------|------------------|--------------|
| PLAT243_ALERT_4_C | High 'Solvent' Ueq as Compared to Neighbors of | C11              | Check        |
| PLAT243_ALERT_4_C | High 'Solvent' Ueq as Compared to Neighbors of | C10A             | Check        |
| PLAT243_ALERT_4_C | High 'Solvent' Ueq as Compared to Neighbors of | C12              | Check        |
| PLAT336_ALERT_2_C | Long Bond Distance for ..... C33               | -C11             | 1.960 Ang.   |
| PLAT336_ALERT_2_C | Long Bond Distance for ..... C33A              | -C10A            | 1.874 Ang.   |
| PLAT342_ALERT_3_C | Low Bond Precision on C-C Bonds .....          |                  | 0.00962 Ang. |
| PLAT911_ALERT_3_C | Missing FCF Refl Between Thmin & STh/L=        | 0.595            | 4 Report     |
| PLAT971_ALERT_2_C | Check Calcd Resid. Dens.                       | 0.91Ang From Br1 | 2.17 eA-3    |
| PLAT971_ALERT_2_C | Check Calcd Resid. Dens.                       | 1.07Ang From Cl1 | 1.66 eA-3    |
| PLAT971_ALERT_2_C | Check Calcd Resid. Dens.                       | 1.22Ang From Br1 | 1.65 eA-3    |
| PLAT972_ALERT_2_C | Check Calcd Resid. Dens.                       | 0.91Ang From Pd1 | -1.62 eA-3   |
| PLAT972_ALERT_2_C | Check Calcd Resid. Dens.                       | 1.00Ang From Cl2 | -1.60 eA-3   |
| PLAT972_ALERT_2_C | Check Calcd Resid. Dens.                       | 0.92Ang From Br1 | -1.53 eA-3   |
| PLAT972_ALERT_2_C | Check Calcd Resid. Dens.                       | 0.92Ang From Pd1 | -1.51 eA-3   |

---

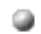

#### Alert level G

|                   |                                                  |       |        |
|-------------------|--------------------------------------------------|-------|--------|
| PLAT072_ALERT_2_G | SHELXL First Parameter in WGHT Unusually Large   | 0.11  | Report |
| PLAT083_ALERT_2_G | SHELXL Second Parameter in WGHT Unusually Large  | 13.46 | Why ?  |
| PLAT302_ALERT_4_G | Anion/Solvent/Minor-Residue Disorder (Resd 2 )   | 25%   | Note   |
| PLAT720_ALERT_4_G | Number of Unusual/Non-Standard Labels .....      | 1     | Note   |
| PLAT794_ALERT_5_G | Tentative Bond Valency for Pd1 (II)              | 2.29  | Info   |
| PLAT909_ALERT_3_G | Percentage of I>2sig(I) Data at Theta(Max) Still | 87%   | Note   |
| PLAT941_ALERT_3_G | Average HKL Measurement Multiplicity .....       | 1.9   | Low    |
| PLAT978_ALERT_2_G | Number C-C Bonds with Positive Residual Density. | 0     | Info   |

---

0 **ALERT level A** = Most likely a serious problem - resolve or explain

2 **ALERT level B** = A potentially serious problem, consider carefully

14 **ALERT level C** = Check. Ensure it is not caused by an omission or oversight

8 **ALERT level G** = General information/check it is not something unexpected

0 ALERT type 1 CIF construction/syntax error, inconsistent or missing data

14 ALERT type 2 Indicator that the structure model may be wrong or deficient

4 ALERT type 3 Indicator that the structure quality may be low

5 ALERT type 4 Improvement, methodology, query or suggestion

1 ALERT type 5 Informative message, check

---

---

It is advisable to attempt to resolve as many as possible of the alerts in all categories. Often the minor alerts point to easily fixed oversights, errors and omissions in your CIF or refinement strategy, so attention to these fine details can be worthwhile. In order to resolve some of the more serious problems it may be necessary to carry out additional measurements or structure refinements. However, the purpose of your study may justify the reported deviations and the more serious of these should normally be commented upon in the discussion or experimental section of a paper or in the "special\_details" fields of the CIF. checkCIF was carefully designed to identify outliers and unusual parameters, but every test has its limitations and alerts that are not important in a particular case may appear. Conversely, the absence of alerts does not guarantee there are no aspects of the results needing attention. It is up to the individual to critically assess their own results and, if necessary, seek expert advice.

### **Publication of your CIF in IUCr journals**

A basic structural check has been run on your CIF. These basic checks will be run on all CIFs submitted for publication in IUCr journals (*Acta Crystallographica*, *Journal of Applied Crystallography*, *Journal of Synchrotron Radiation*); however, if you intend to submit to *Acta Crystallographica Section C* or *E* or *IUCrData*, you should make sure that full publication checks are run on the final version of your CIF prior to submission.

### **Publication of your CIF in other journals**

Please refer to the *Notes for Authors* of the relevant journal for any special instructions relating to CIF submission.

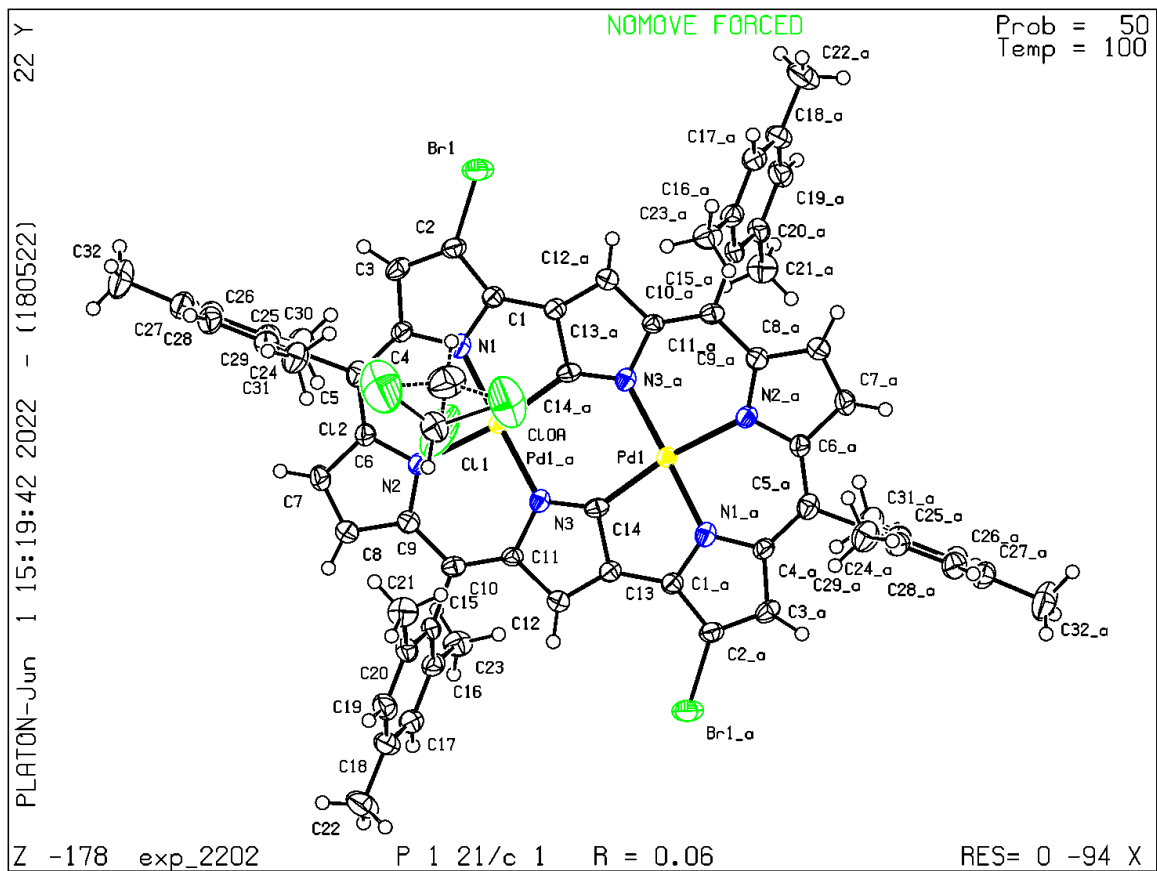

Supplement: Supplementary file 3 [file 047a33c129a074850b73fce9.pdf]
