# Supplementary material for: Doubly N-Confused and Ring-Contracted [24]Hexaphyrin Pd-Complexes: Stable Antiaromatic N-Confused Expanded Porphyrins
Source: Research Square preprint supplement (doi:10.21203/rs.3.rs-2643897/v1), 2023-03-20

## checkCIF/PLATON report

Structure factors have been supplied for datablock(s) exp\_2776\_sq

THIS REPORT IS FOR GUIDANCE ONLY. IF USED AS PART OF A REVIEW PROCEDURE FOR PUBLICATION, IT SHOULD NOT REPLACE THE EXPERTISE OF AN EXPERIENCED CRYSTALLOGRAPHIC REFEREE.

No syntax errors found.      CIF dictionary      Interpreting this report

### Datablock: exp\_2776\_sq

---

Bond precision:      C-C = 0.0145 Å      Wavelength=1.54184

Cell:                      a=14.3028 (4)                      b=17.0485 (5)                      c=22.8204 (6)  
                              alpha=100.119 (2)                      beta=108.070 (2)                      gamma=103.957 (2)  
Temperature:      101 K

|                        | Calculated                           | Reported              |
|------------------------|--------------------------------------|-----------------------|
| Volume                 | 4941.1 (3)                           | 4941.1 (2)            |
| Space group            | P -1                                 | P -1                  |
| Hall group             | -P 1                                 | -P 1                  |
| Moiety formula         | C188 H194 N14 Ni2 Pd2 [+<br>solvent] | C188 H194 N14 Ni2 Pd2 |
| Sum formula            | C188 H194 N14 Ni2 Pd2 [+<br>solvent] | C188 H194 N14 Ni2 Pd2 |
| Mr                     | 2979.76                              | 2979.78               |
| Dx, g cm <sup>-3</sup> | 1.001                                | 1.001                 |
| Z                      | 1                                    | 1                     |
| Mu (mm <sup>-1</sup> ) | 2.011                                | 2.011                 |
| F000                   | 1568.0                               | 1568.0                |
| F000'                  | 1565.85                              |                       |
| h, k, lmax             | 17, 20, 27                           | 17, 20, 27            |
| Nref                   | 17435                                | 17419                 |
| Tmin, Tmax             | 0.574, 0.818                         | 0.729, 1.000          |
| Tmin'                  | 0.521                                |                       |

Correction method= # Reported T Limits: Tmin=0.729 Tmax=1.000

AbsCorr = MULTI-SCAN

Data completeness= 0.999

Theta(max)= 66.601

R(reflections)= 0.1079( 14724)

wR2(reflections)=  
0.2932( 17419)

S = 1.065

Npar= 982

The following ALERTS were generated. Each ALERT has the format

**test-name\_ALERT\_alert-type\_alert-level.**

Click on the hyperlinks for more details of the test.

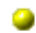

### Alert level C

|                   |                                                  |         |        |
|-------------------|--------------------------------------------------|---------|--------|
| PLAT082_ALERT_2_C | High R1 Value .....                              | 0.11    | Report |
| PLAT084_ALERT_3_C | High wR2 Value (i.e. > 0.25) .....               | 0.29    | Report |
| PLAT094_ALERT_2_C | Ratio of Maximum / Minimum Residual Density .... | 2.17    | Report |
| PLAT213_ALERT_2_C | Atom C82 has ADP max/min Ratio .....             | 3.3     | prolat |
| PLAT220_ALERT_2_C | NonSolvent Resd 1 C Ueq(max)/Ueq(min) Range      | 5.0     | Ratio  |
| PLAT222_ALERT_3_C | NonSolvent Resd 1 H Uiso(max)/Uiso(min) Range    | 6.0     | Ratio  |
| PLAT234_ALERT_4_C | Large Hirshfeld Difference C55 --C58 .           | 0.20    | Ang.   |
| PLAT234_ALERT_4_C | Large Hirshfeld Difference C86 --C87 .           | 0.16    | Ang.   |
| PLAT242_ALERT_2_C | Low 'MainMol' Ueq as Compared to Neighbors of    | C52     | Check  |
| PLAT242_ALERT_2_C | Low 'MainMol' Ueq as Compared to Neighbors of    | C55     | Check  |
| PLAT242_ALERT_2_C | Low 'MainMol' Ueq as Compared to Neighbors of    | C93     | Check  |
| PLAT342_ALERT_3_C | Low Bond Precision on C-C Bonds .....            | 0.01455 | Ang.   |
| PLAT906_ALERT_3_C | Large K Value in the Analysis of Variance .....  | 3.502   | Check  |
| PLAT906_ALERT_3_C | Large K Value in the Analysis of Variance .....  | 2.025   | Check  |
| PLAT911_ALERT_3_C | Missing FCF Refl Between Thmin & STh/L= 0.595    | 15      | Report |
| PLAT971_ALERT_2_C | Check Calcd Resid. Dens. 1.23Ang From C86        | 2.37    | eA-3   |
| PLAT971_ALERT_2_C | Check Calcd Resid. Dens. 0.92Ang From Pd1        | 1.95    | eA-3   |
| PLAT971_ALERT_2_C | Check Calcd Resid. Dens. 0.96Ang From Pd1        | 1.93    | eA-3   |
| PLAT971_ALERT_2_C | Check Calcd Resid. Dens. 0.95Ang From C30        | 1.80    | eA-3   |
| PLAT971_ALERT_2_C | Check Calcd Resid. Dens. 1.32Ang From Pd1        | 1.63    | eA-3   |

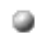

### Alert level G

|                   |                                                  |        |        |
|-------------------|--------------------------------------------------|--------|--------|
| PLAT002_ALERT_2_G | Number of Distance or Angle Restraints on AtSite | 8      | Note   |
| PLAT003_ALERT_2_G | Number of Uiso or Uij Restrained non-H Atoms ... | 8      | Report |
| PLAT072_ALERT_2_G | SHELXL First Parameter in WGHT Unusually Large   | 0.11   | Report |
| PLAT083_ALERT_2_G | SHELXL Second Parameter in WGHT Unusually Large  | 38.33  | Why ?  |
| PLAT154_ALERT_1_G | The s.u.'s on the Cell Angles are Equal ..(Note) | 0.002  | Degree |
| PLAT172_ALERT_4_G | The CIF-Embedded .res File Contains DFIX Records | 18     | Report |
| PLAT176_ALERT_4_G | The CIF-Embedded .res File Contains SADI Records | 3      | Report |
| PLAT177_ALERT_4_G | The CIF-Embedded .res File Contains DELU Records | 1      | Report |
| PLAT186_ALERT_4_G | The CIF-Embedded .res File Contains ISOR Records | 3      | Report |
| PLAT301_ALERT_3_G | Main Residue Disorder .....(Resd 1 )             | 3%     | Note   |
| PLAT412_ALERT_2_G | Short Intra XH3 .. XHn H51 ..H60A .              | 2.02   | Ang.   |
|                   | x,y,z =                                          | 1_555  | Check  |
| PLAT412_ALERT_2_G | Short Intra XH3 .. XHn H53 ..H61C .              | 1.90   | Ang.   |
|                   | x,y,z =                                          | 1_555  | Check  |
| PLAT606_ALERT_4_G | Solvent Accessible VOID(S) in Structure .....    | !      | Info   |
| PLAT794_ALERT_5_G | Tentative Bond Valency for Pd1 (II) .            | 2.39   | Info   |
| PLAT794_ALERT_5_G | Tentative Bond Valency for Ni1 (II) .            | 2.13   | Info   |
| PLAT860_ALERT_3_G | Number of Least-Squares Restraints .....         | 66     | Note   |
| PLAT869_ALERT_4_G | ALERTS Related to the Use of SQUEEZE Suppressed  | !      | Info   |
| PLAT883_ALERT_1_G | No Info/Value for _atom_sites_solution_primary . | Please | Do !   |
| PLAT909_ALERT_3_G | Percentage of I>2sig(I) Data at Theta(Max) Still | 76%    | Note   |
| PLAT910_ALERT_3_G | Missing # of FCF Reflection(s) Below Theta(Min). | 1      | Note   |

|                   |                                                  |            |      |       |
|-------------------|--------------------------------------------------|------------|------|-------|
| PLAT930_ALERT_2_G | FCF-based Twin Law ( 0 0 1)                      | Est.d BASF | 0.16 | Check |
| PLAT931_ALERT_5_G | CIFcalcFCF Twin Law ( 0 0 1)                     | Est.d BASF | 0.20 | Check |
| PLAT933_ALERT_2_G | Number of HKL-OMIT Records in Embedded .res File |            | 6    | Note  |
| PLAT941_ALERT_3_G | Average HKL Measurement Multiplicity .....       |            | 1.9  | Low   |
| PLAT978_ALERT_2_G | Number C-C Bonds with Positive Residual Density. |            | 0    | Info  |

---

0 **ALERT level A** = Most likely a serious problem - resolve or explain  
 0 **ALERT level B** = A potentially serious problem, consider carefully  
 20 **ALERT level C** = Check. Ensure it is not caused by an omission or oversight  
 25 **ALERT level G** = General information/check it is not something unexpected

2 ALERT type 1 CIF construction/syntax error, inconsistent or missing data  
 21 ALERT type 2 Indicator that the structure model may be wrong or deficient  
 11 ALERT type 3 Indicator that the structure quality may be low  
 8 ALERT type 4 Improvement, methodology, query or suggestion  
 3 ALERT type 5 Informative message, check

---

It is advisable to attempt to resolve as many as possible of the alerts in all categories. Often the minor alerts point to easily fixed oversights, errors and omissions in your CIF or refinement strategy, so attention to these fine details can be worthwhile. In order to resolve some of the more serious problems it may be necessary to carry out additional measurements or structure refinements. However, the purpose of your study may justify the reported deviations and the more serious of these should normally be commented upon in the discussion or experimental section of a paper or in the "special\_details" fields of the CIF. checkCIF was carefully designed to identify outliers and unusual parameters, but every test has its limitations and alerts that are not important in a particular case may appear. Conversely, the absence of alerts does not guarantee there are no aspects of the results needing attention. It is up to the individual to critically assess their own results and, if necessary, seek expert advice.

### Publication of your CIF in IUCr journals

A basic structural check has been run on your CIF. These basic checks will be run on all CIFs submitted for publication in IUCr journals (*Acta Crystallographica*, *Journal of Applied Crystallography*, *Journal of Synchrotron Radiation*); however, if you intend to submit to *Acta Crystallographica Section C* or *E* or *IUCrData*, you should make sure that full publication checks are run on the final version of your CIF prior to submission.

### Publication of your CIF in other journals

Please refer to the *Notes for Authors* of the relevant journal for any special instructions relating to CIF submission.

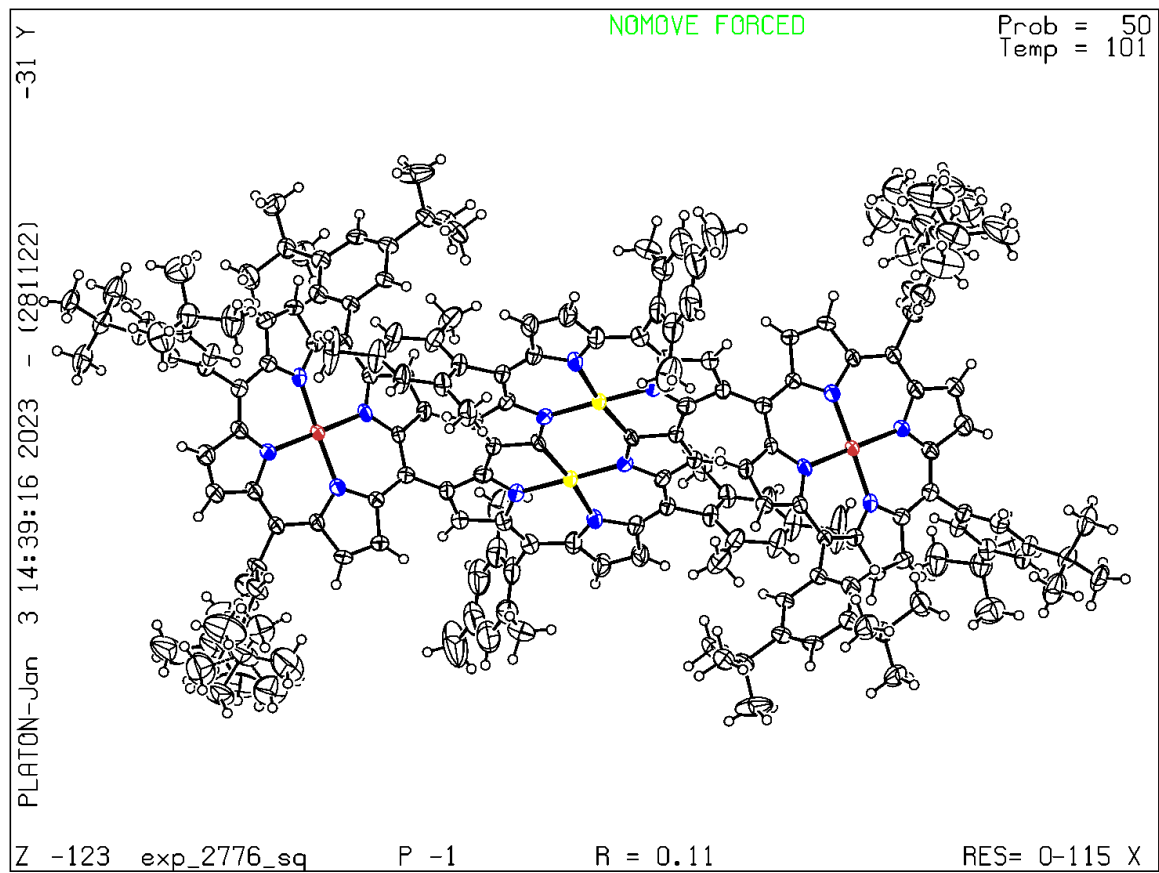

Supplement: Supplementary file 6 [file 49341ed2e37c351fb1b95047.pdf]
