# Supplementary material for: Doubly N-Confused and Ring-Contracted [24]Hexaphyrin Pd-Complexes: Stable Antiaromatic N-Confused Expanded Porphyrins
Source: Research Square preprint supplement (doi:10.21203/rs.3.rs-2643897/v1), 2023-03-20
Supplement: Supplementary file 1 [file 5168030103d4da62e6c9369e.docx]

Supplementary Information for

**Doubly N-Confused and Ring-Contracted [24]Hexaphyrin Pd-Complexes: Stable Antiaromatic N-Confused Expanded Porphyrins**

Luo and Liu et al.

**Proposed mechanism for the formation of 8 and 9**

**Supplementary Figures**


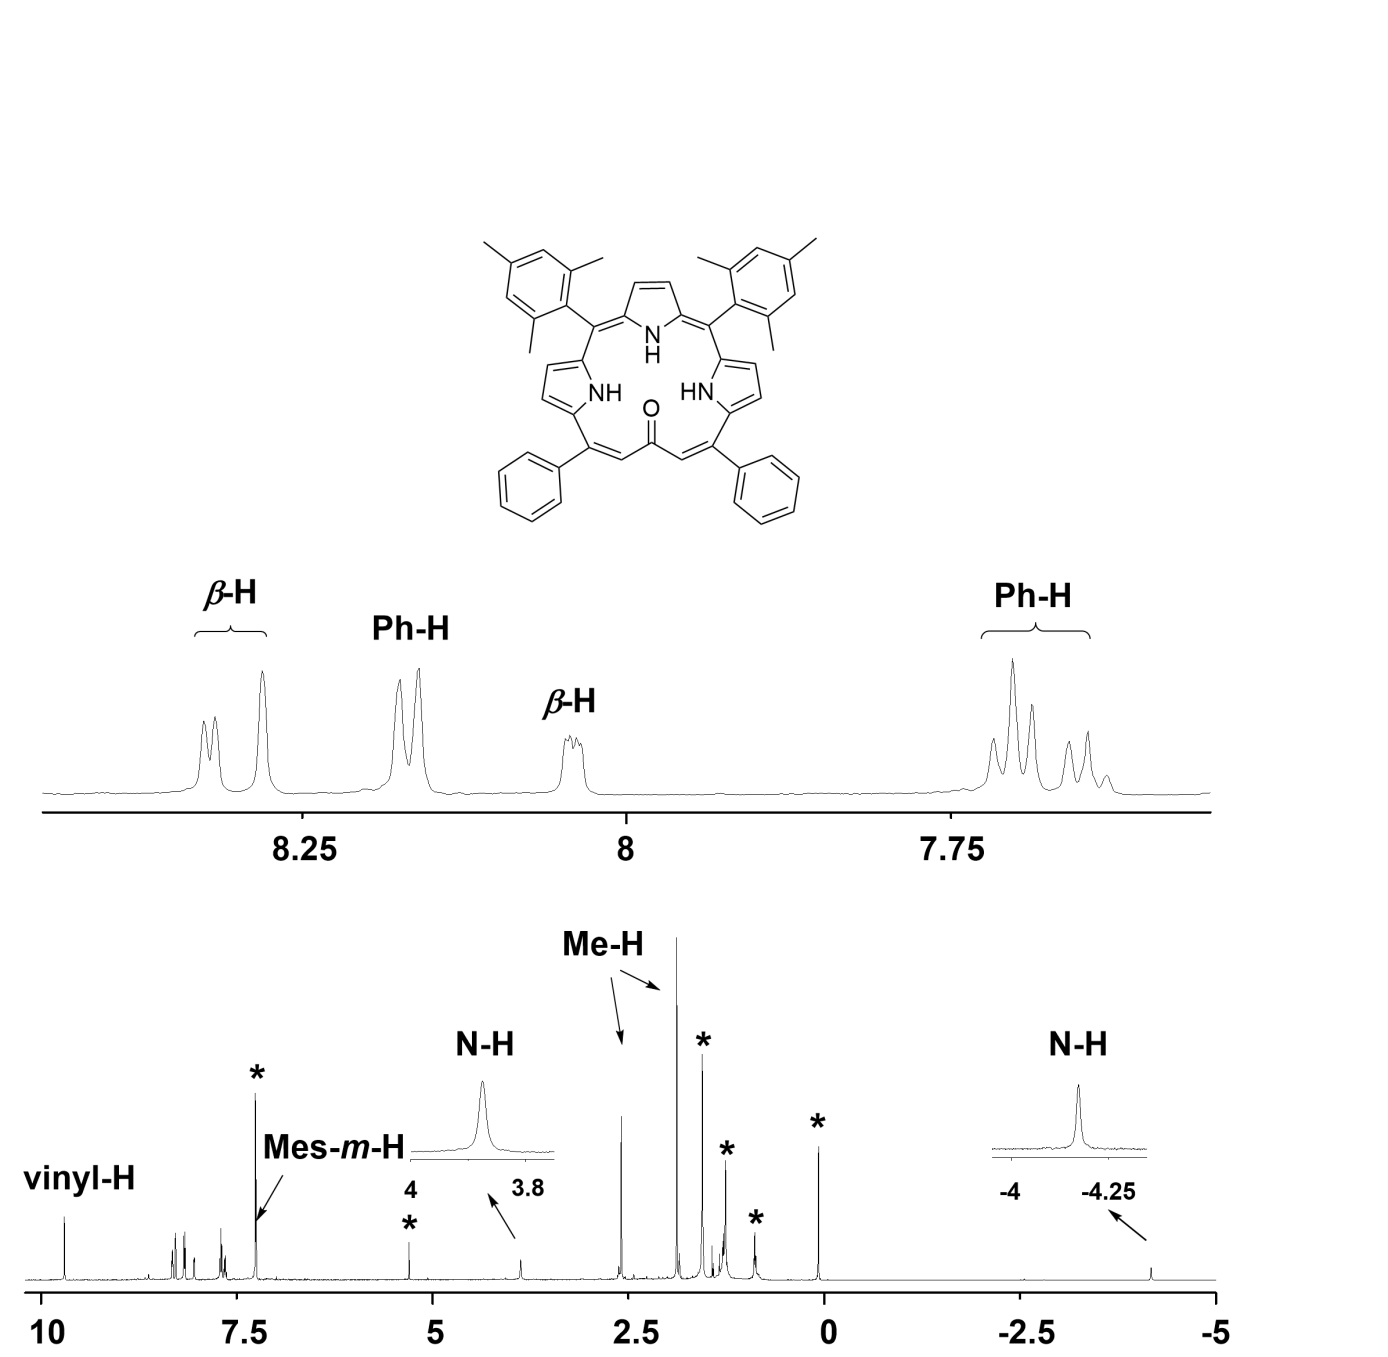


**Supplementary Figure 1.** 1H NMR spectrum of **6** in CDCl3. *Solvent or impurities





**Supplementary Figure 2.** 1H NMR spectrum of **7** in CDCl3. *Solvent or impurities





**Supplementary Figure 3.** 1H NMR spectrum of **8** in CDCl3. *Solvent or impurities





**Supplementary Figure 4.** 1C NMR spectrum of **8a** in CDCl3. *Solvent or impurities





**Supplementary Figure 5.** 1H NMR spectrum of **8b** in CDCl3. *Solvent or impurities


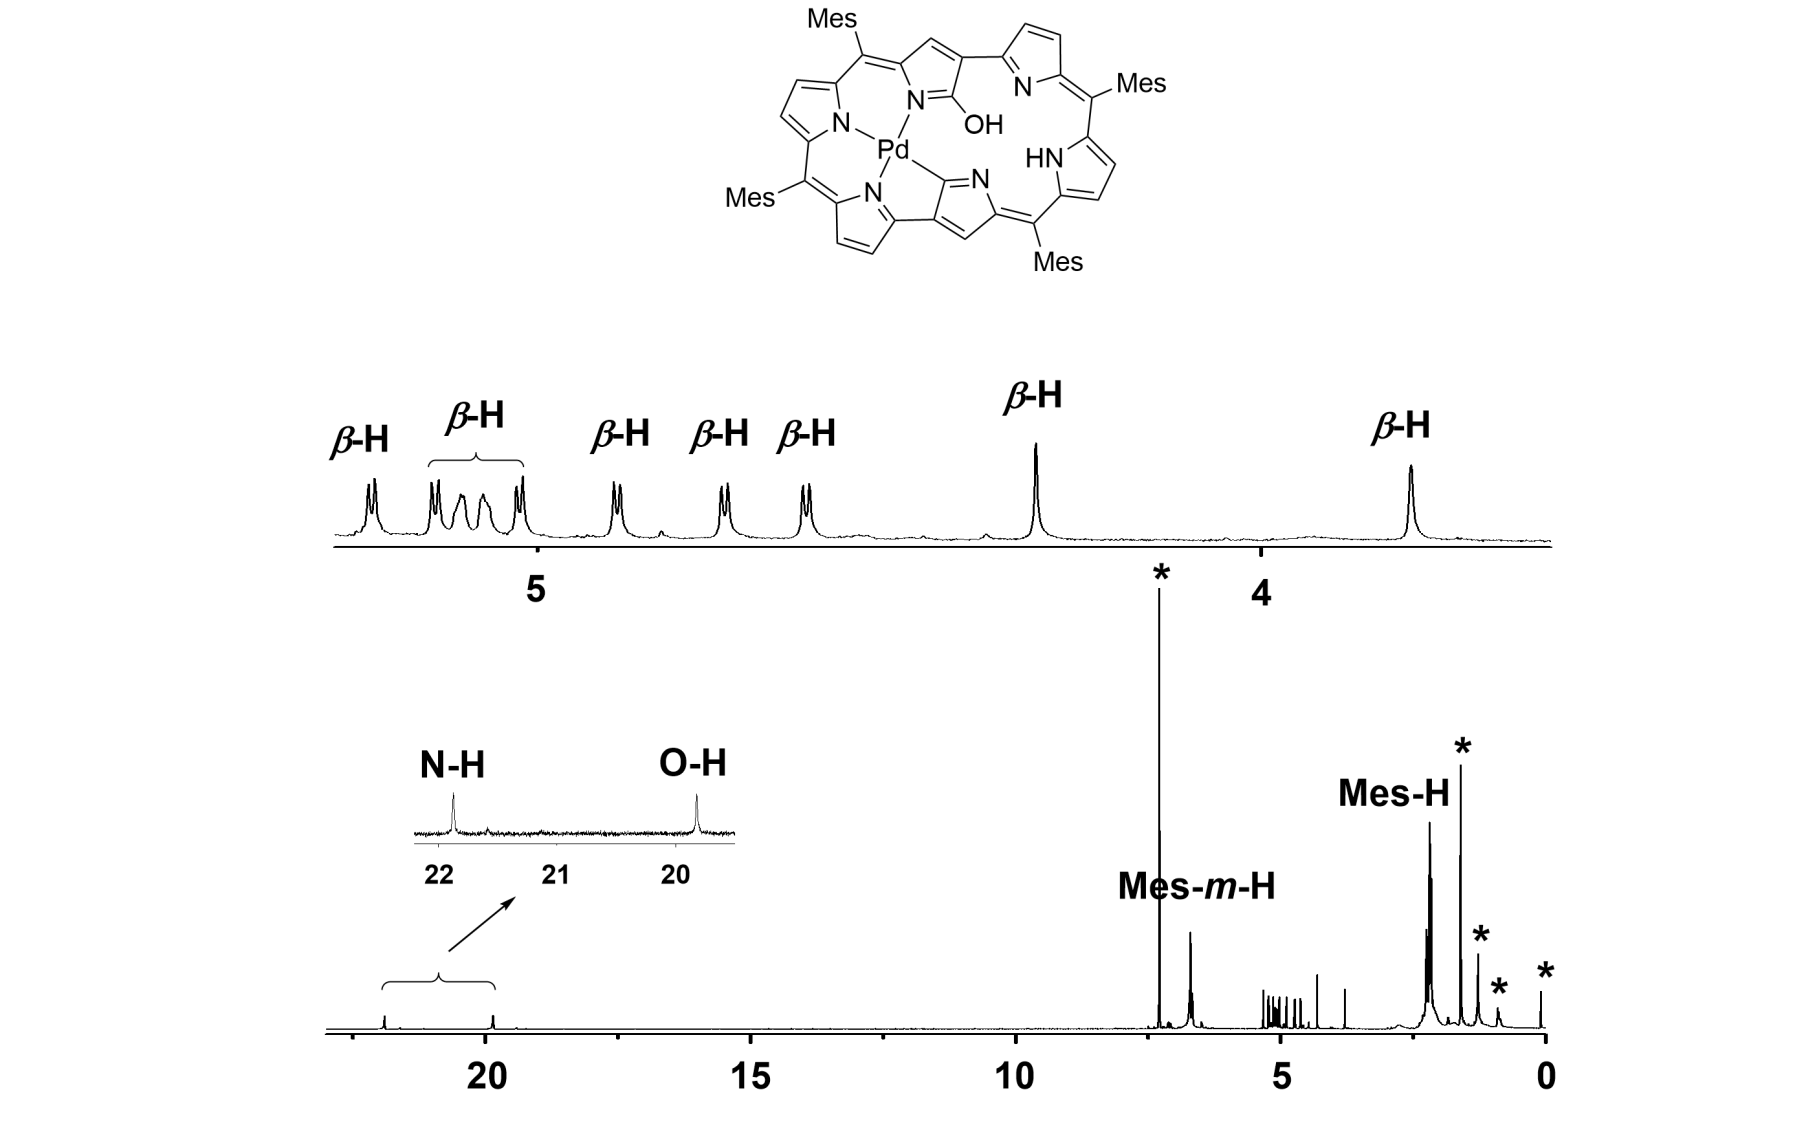


**Supplementary Figure 6.** 1H NMR spectrum of **9E** in CDCl3. *Solvent or impurities





**Supplementary Figure 7.** 1H NMR spectra of **9** and **9+D2O** in CDCl3.


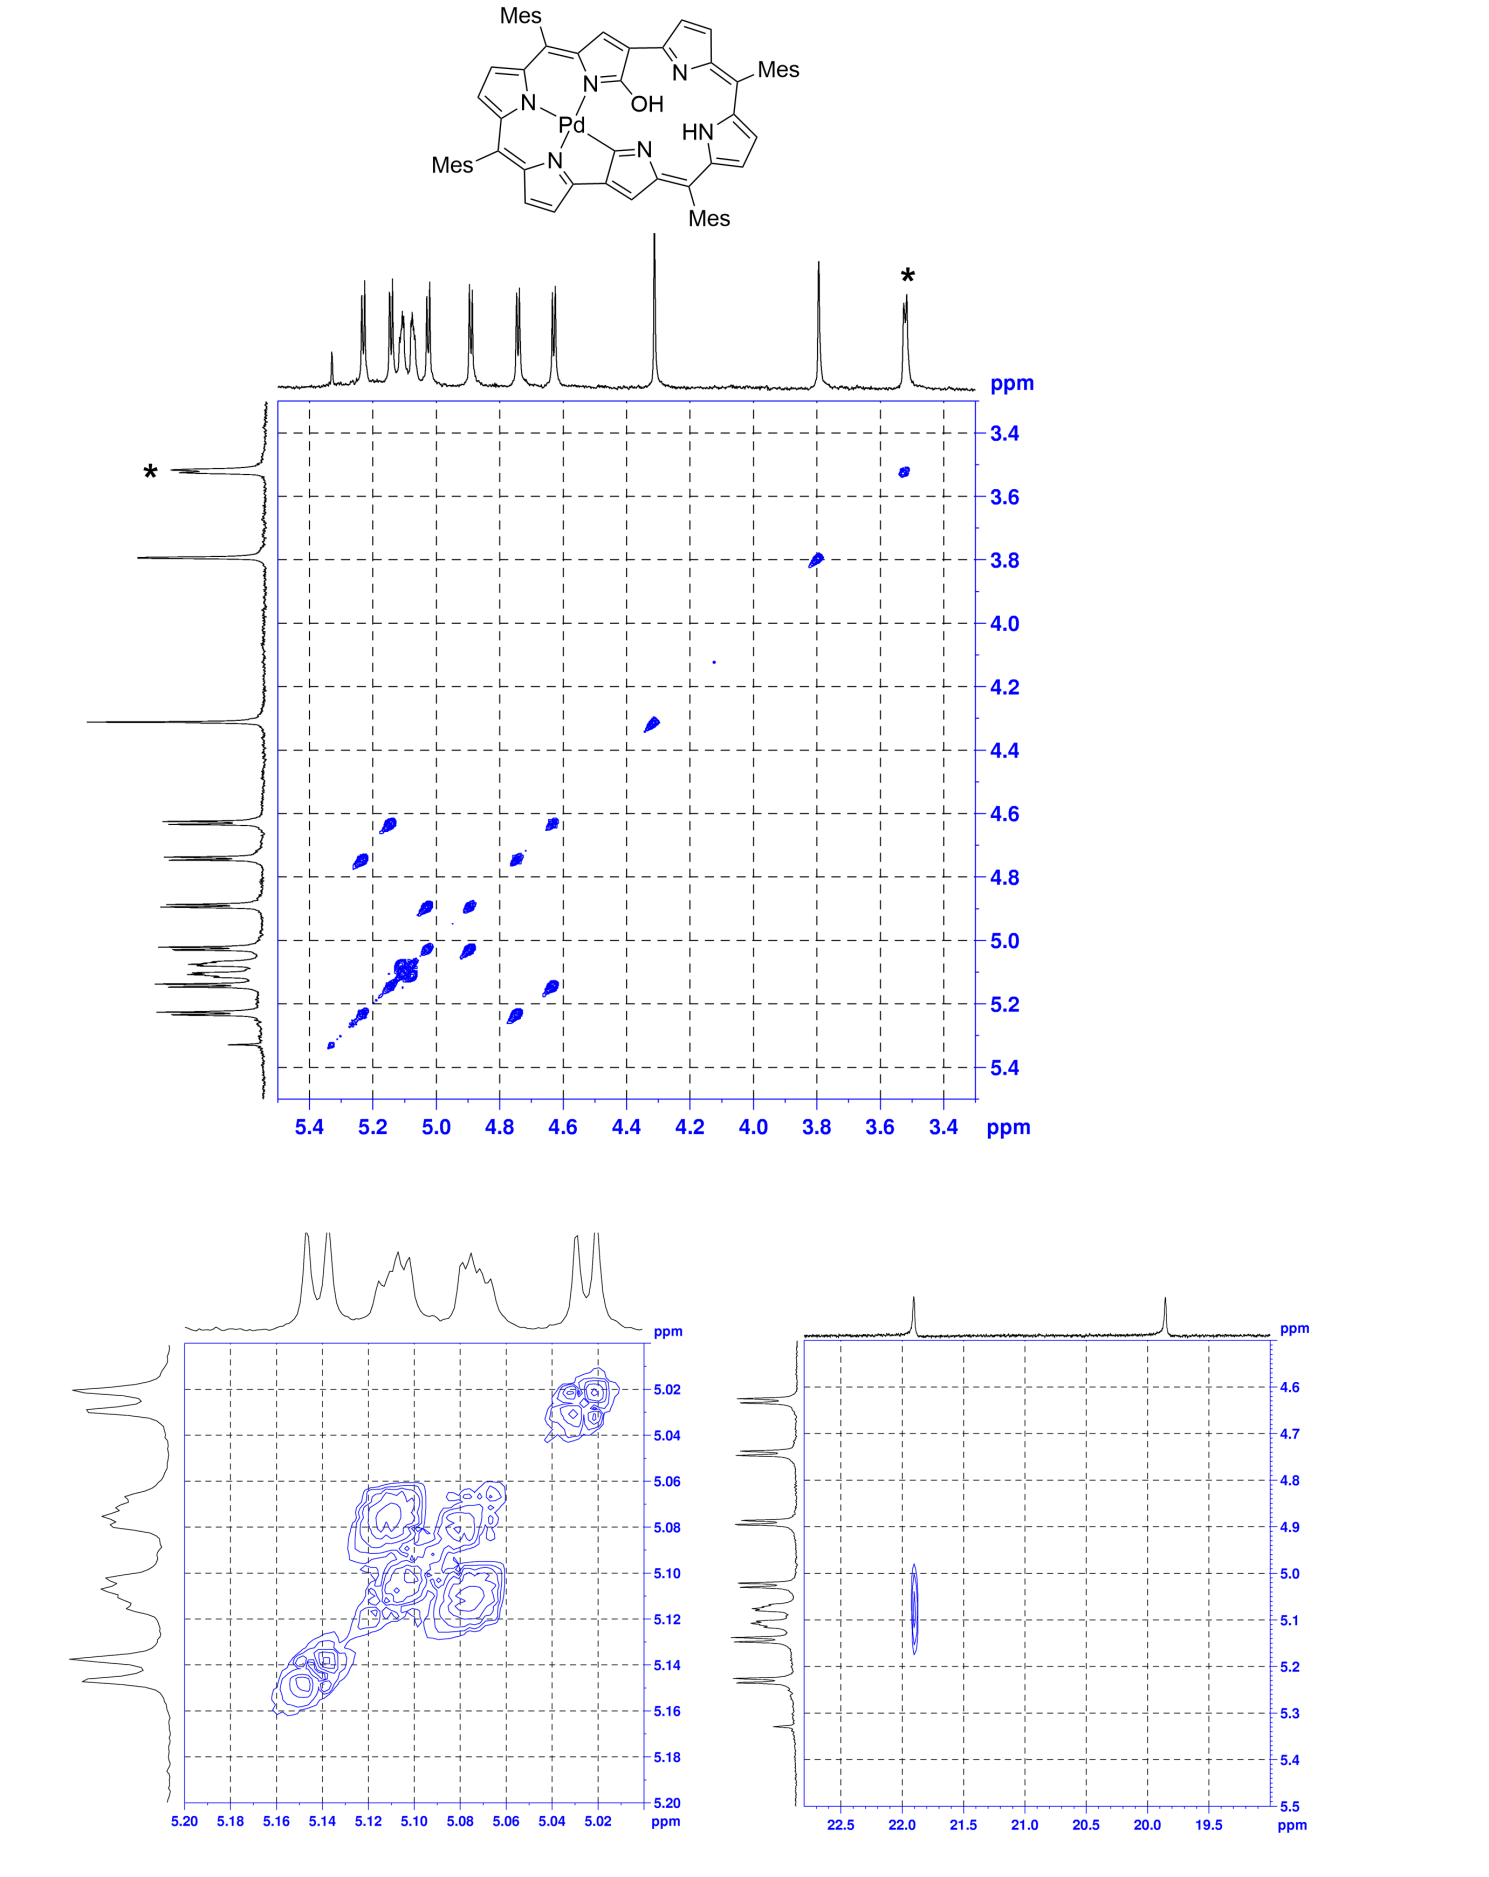


**Supplementary Figure 8**. COSY spectrum of **9E** in CDCl3.


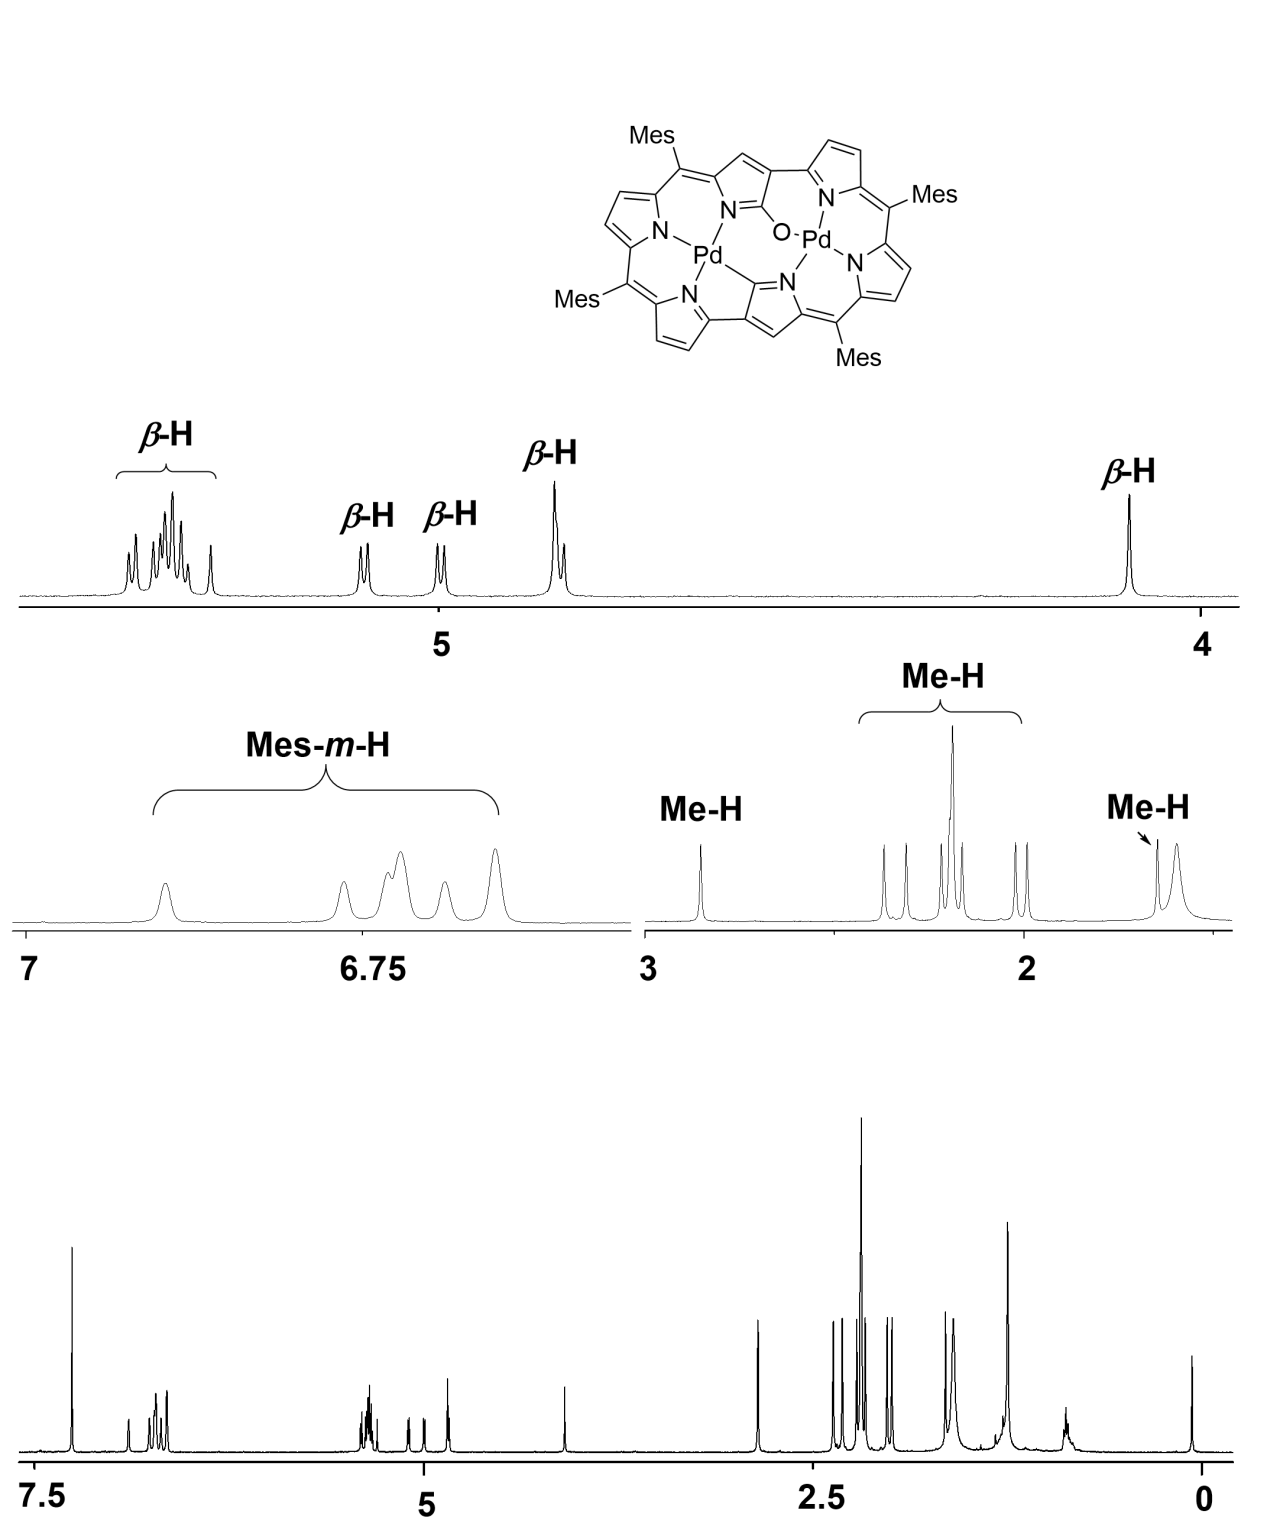


**Supplementary Figure 9.** 1H NMR spectrum of **9Pd** in CDCl3. *Solvent or impurities


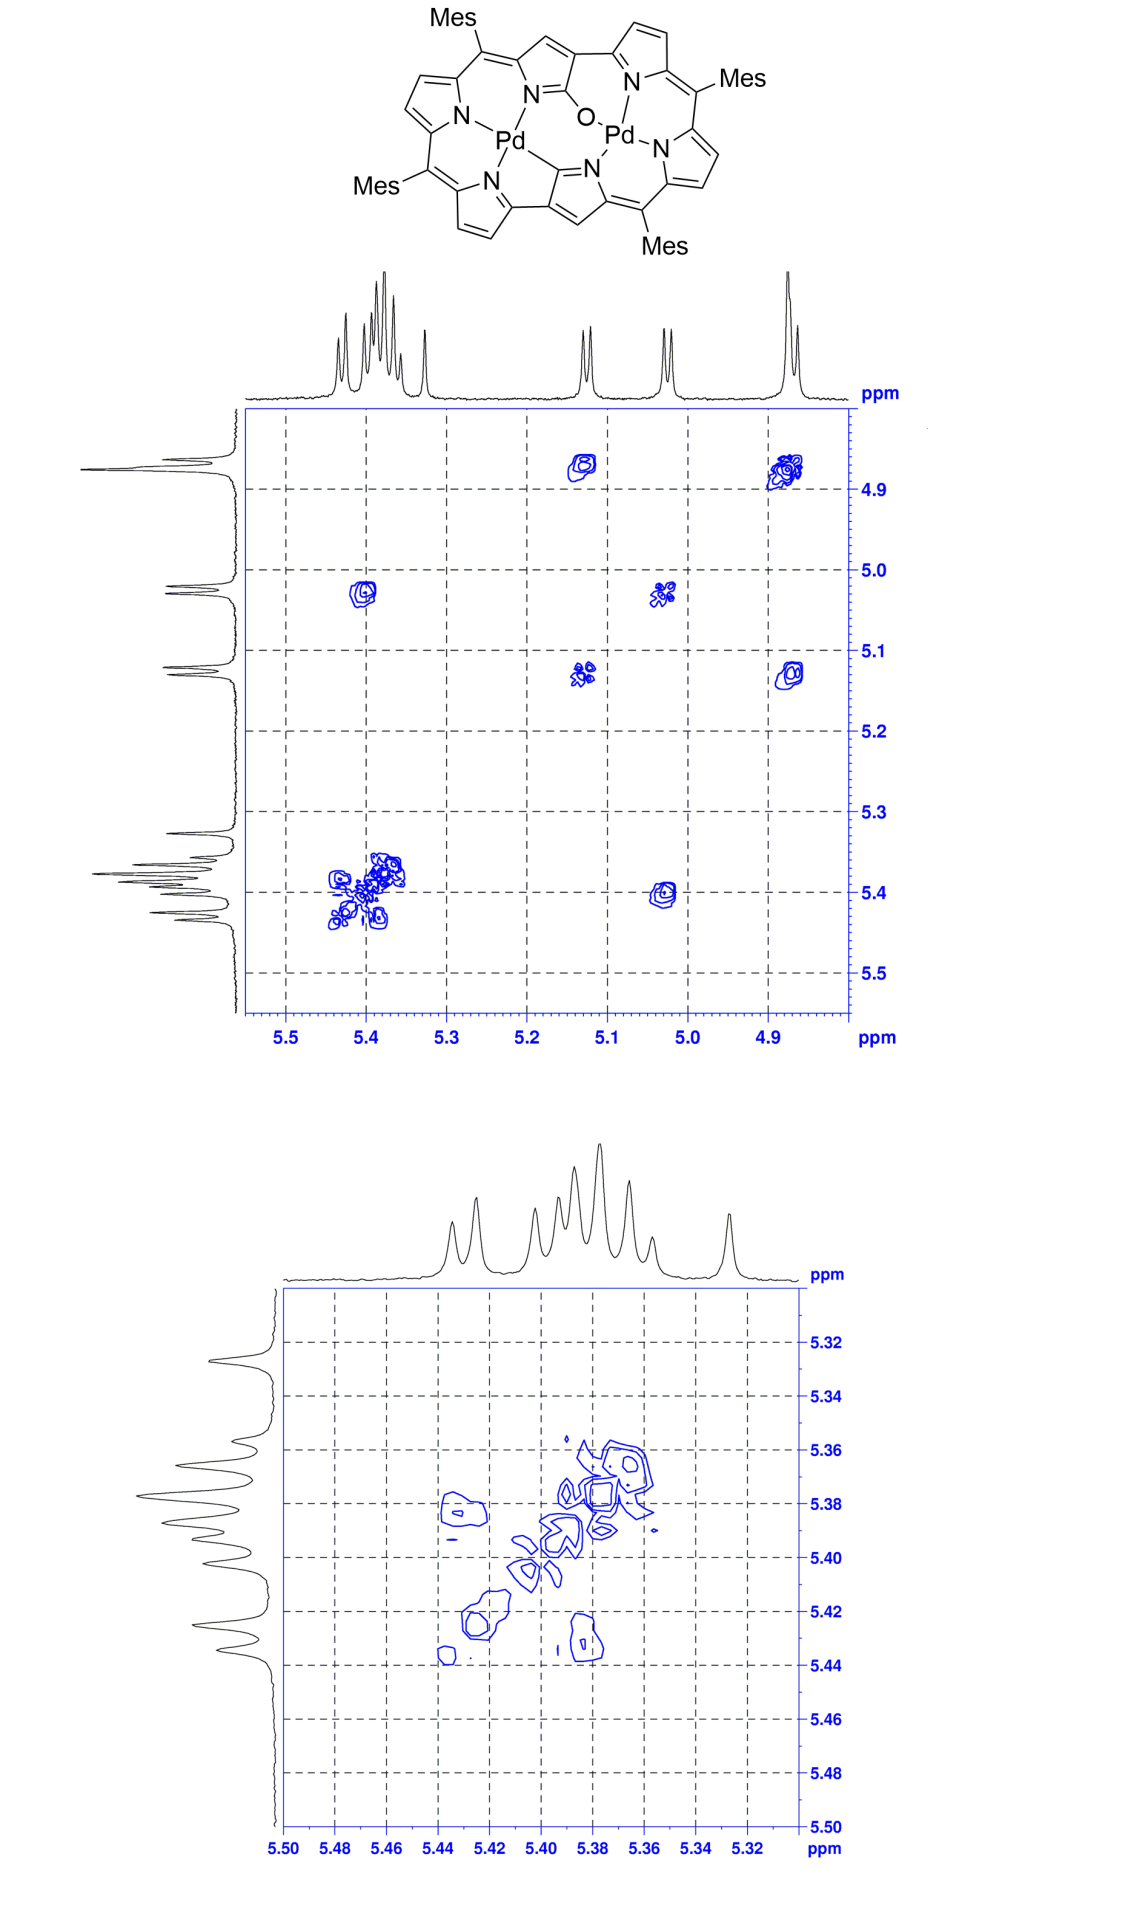


**Supplementary Figure 10**. COSY spectrum of **9Pd** in CDCl3.


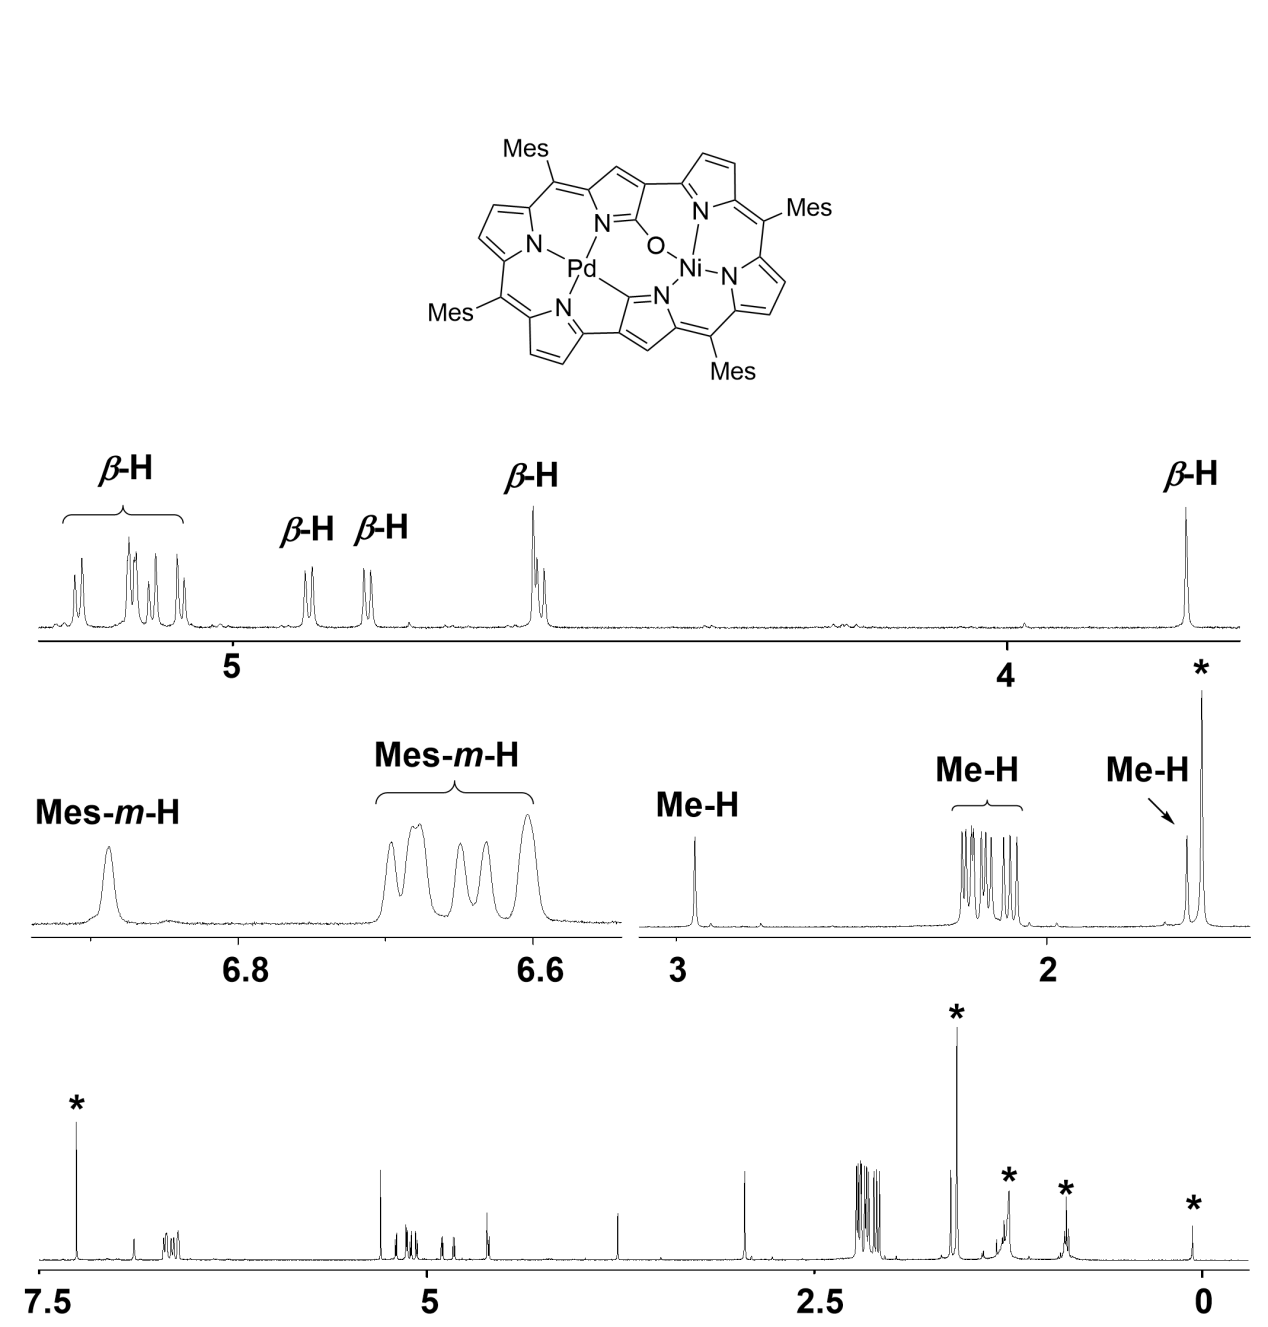


**Supplementary Figure 11.** 1H NMR spectrum of **9Ni** in CDCl3. *Solvent or impurities


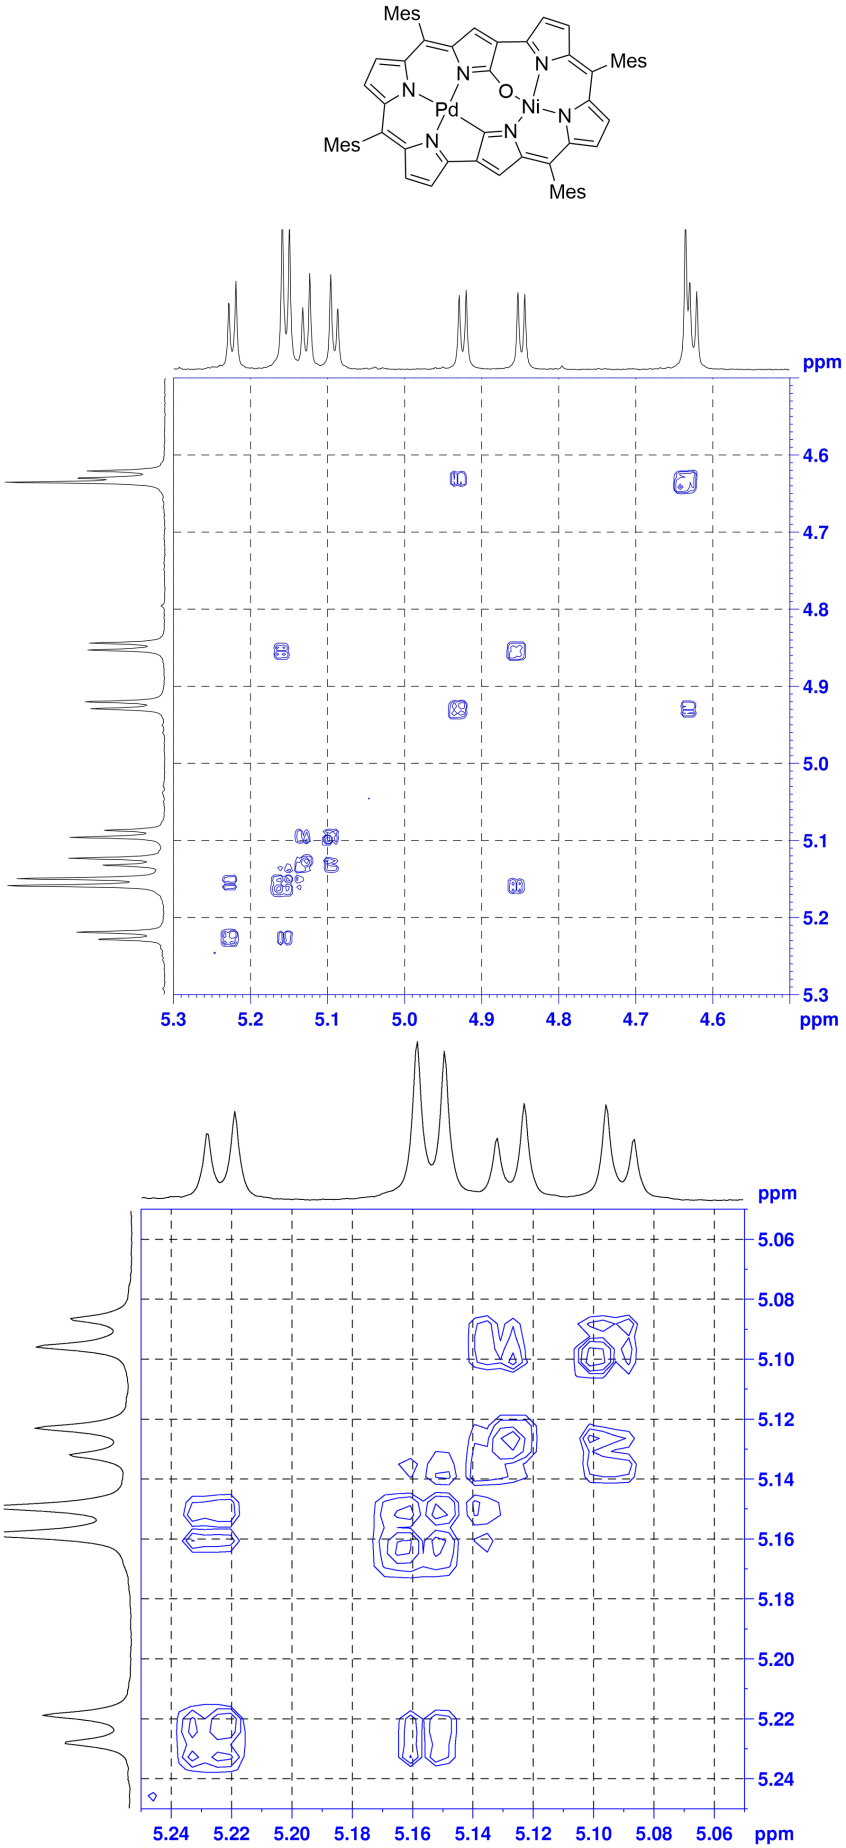


**Supplementary Figure 12**. COSY spectrum of **9Ni** in CDCl3.





**Supplementary Figure 13**. 1H NMR spectrum of **10** in CDCl3. *Solvent or impurities


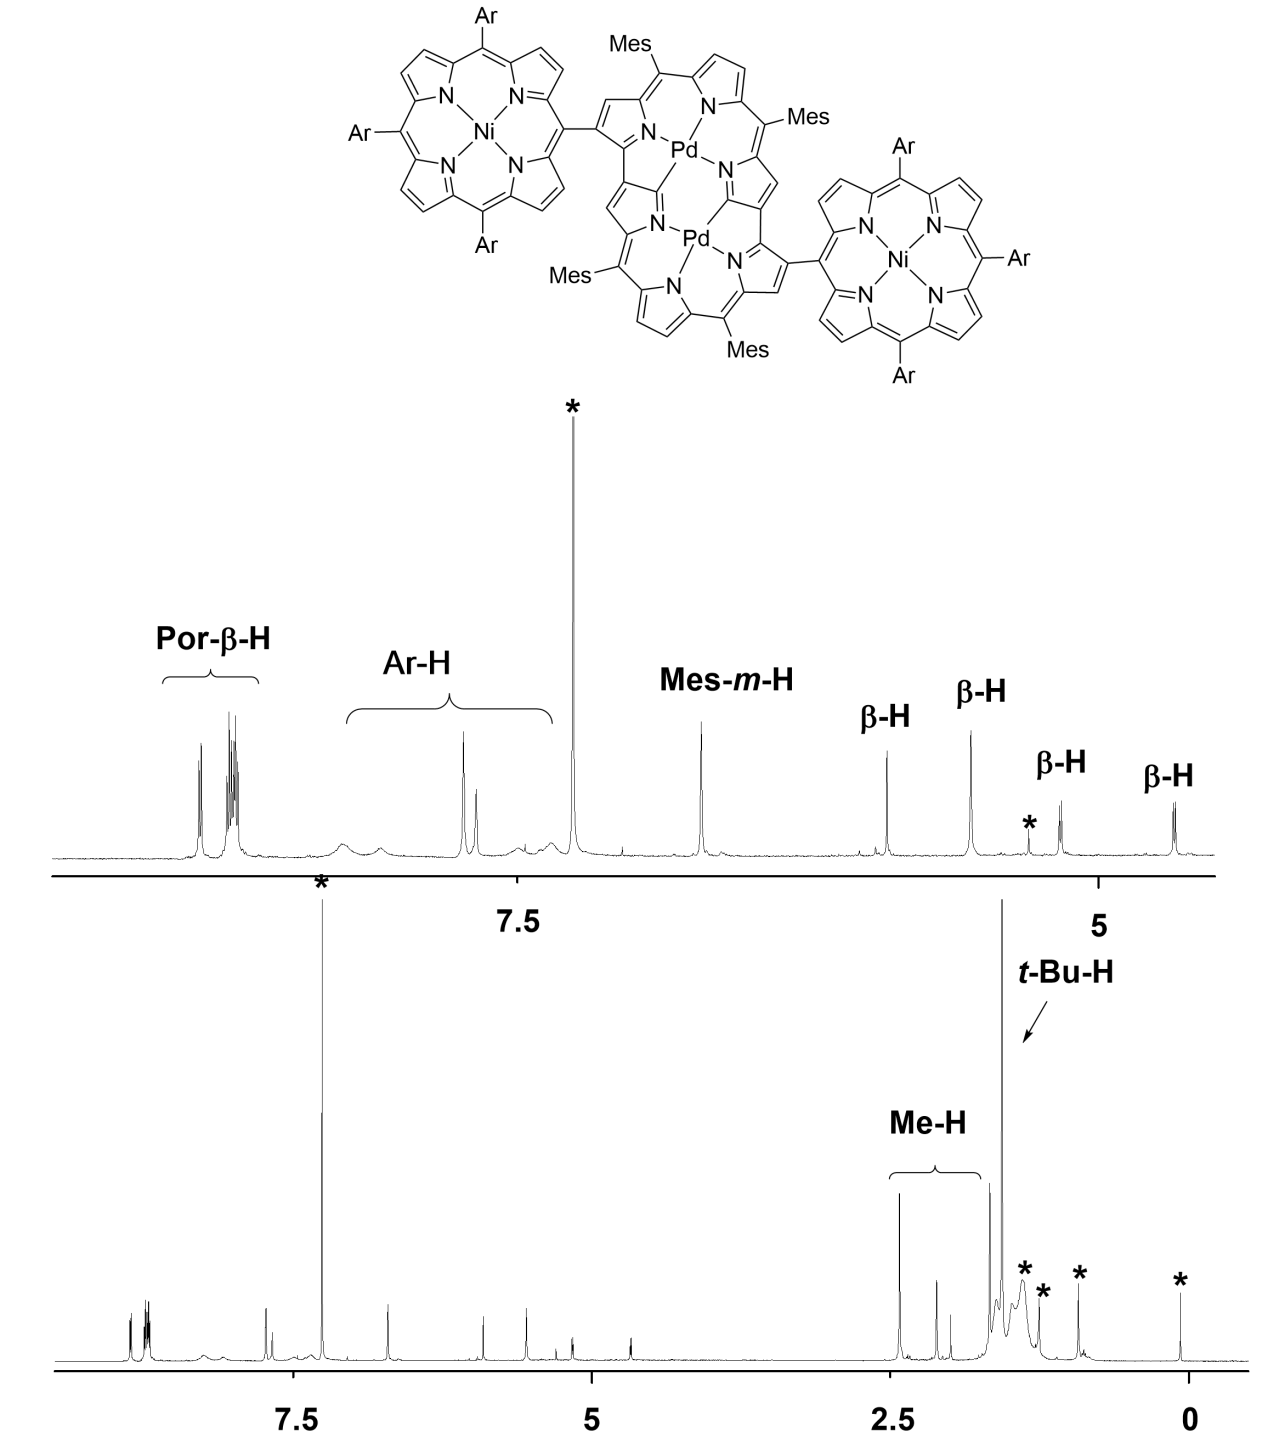


**Supplementary Figure 14**. 1H NMR spectrum of **12** in CDCl3. *Solvent or impurities

**UV/Vis Absorption Spectra**





**Supplementary Figure 15**. UV-Vis absorption spectra of **8**, **9**, **9Pd**, **9Ni** and **9Cu**.





**Supplementary Figure 16**. UV-Vis absorption spectra of **8**, **10** and **12**.


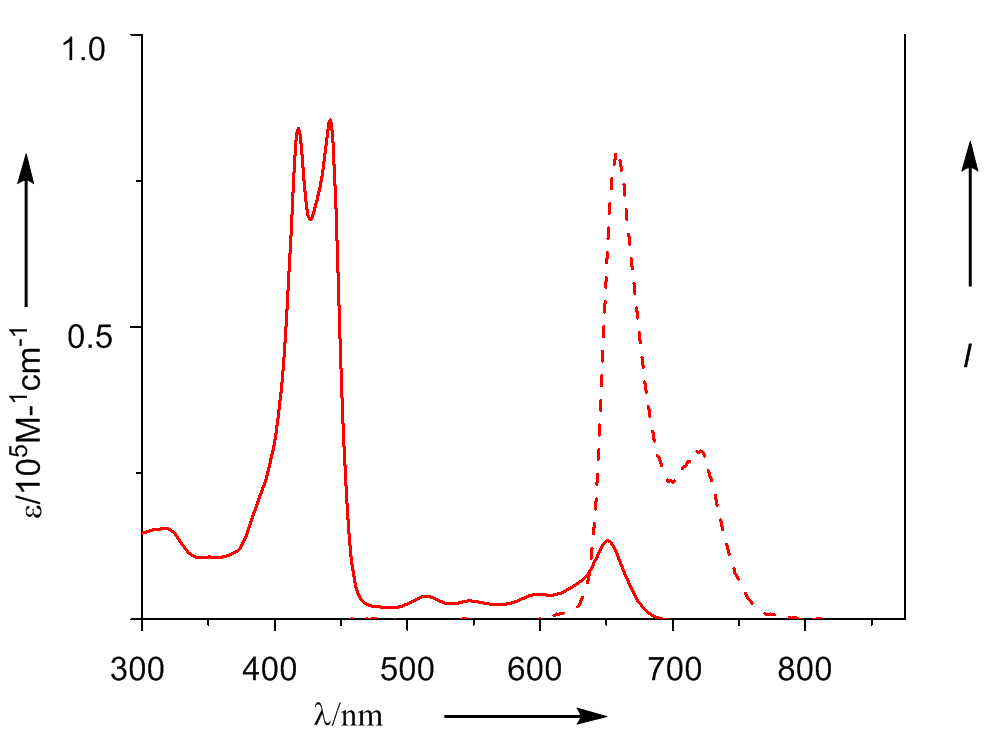
.

**Supplementary Figure 17**. UV-Vis absorption spectrum (solid line) and fluorescence spectrum (dash line) of **6** in CH2Cl2.

**MALDI-TOF-MS of Compounds**

**Supplementary Figure 18**. MALDI-TOF-MS spectrum of **6**.

**Supplementary Figure 19**. MALDI-TOF-MS spectrum of **7**.

**Supplementary Figure 20**. MALDI-TOF-MS spectrum of **8**.

**Supplementary Figure 21**. MALDI-TOF-MS spectrum of **8a**.

**Supplementary Figure 22**. MALDI-TOF-MS spectrum of **8b**.

**Supplementary Figure 23**. MALDI-TOF-MS spectrum of **9**.

**Supplementary Figure 24**. MALDI-TOF-MS spectrum of **9Pd**.

**Supplementary Figure 25**. MALDI-TOF-MS spectrum of **9Cu**.

**Supplementary Figure 26**. MALDI-TOF-MS spectrum of **9Ni**.

**Supplementary Figure 27**. MALDI-TOF-MS spectrum of **10**.

**Supplementary Figure 28**. MALDI-TOF-MS spectrum of **12**.

**Electrochemical Data**

Conditions: 0.1M *n*Bu4NPF6 as electrolyte. Working electrode: Pt electrode, Counter electrode: Pt wire. Reference electrode: Ag/AgNO3. Scan rate: 0.05 V/s. Potentials (V) vs. ferrocene/ferrocenium ion couple.





**Supplementary Figure 29**. Cyclic voltammogram and differential-pulse voltammogram of **8**.


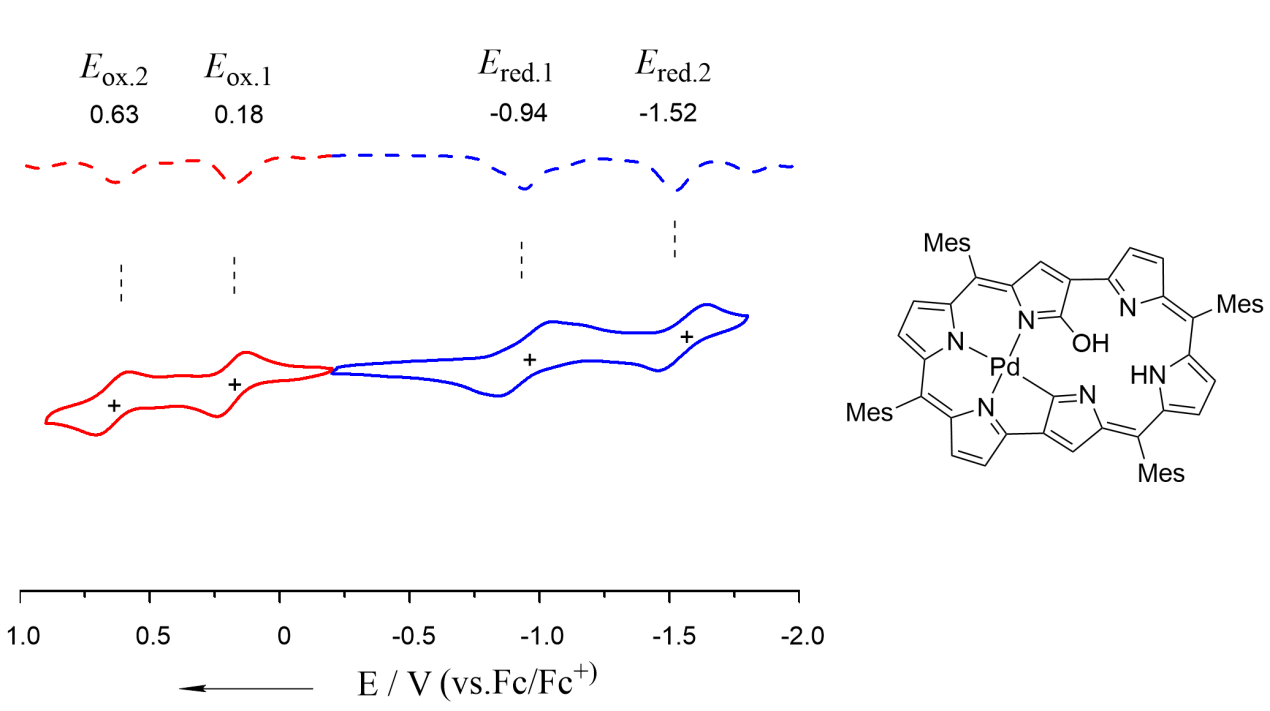


**Supplementary Figure 30**. Cyclic voltammogram and differential-pulse voltammogram of **9**.


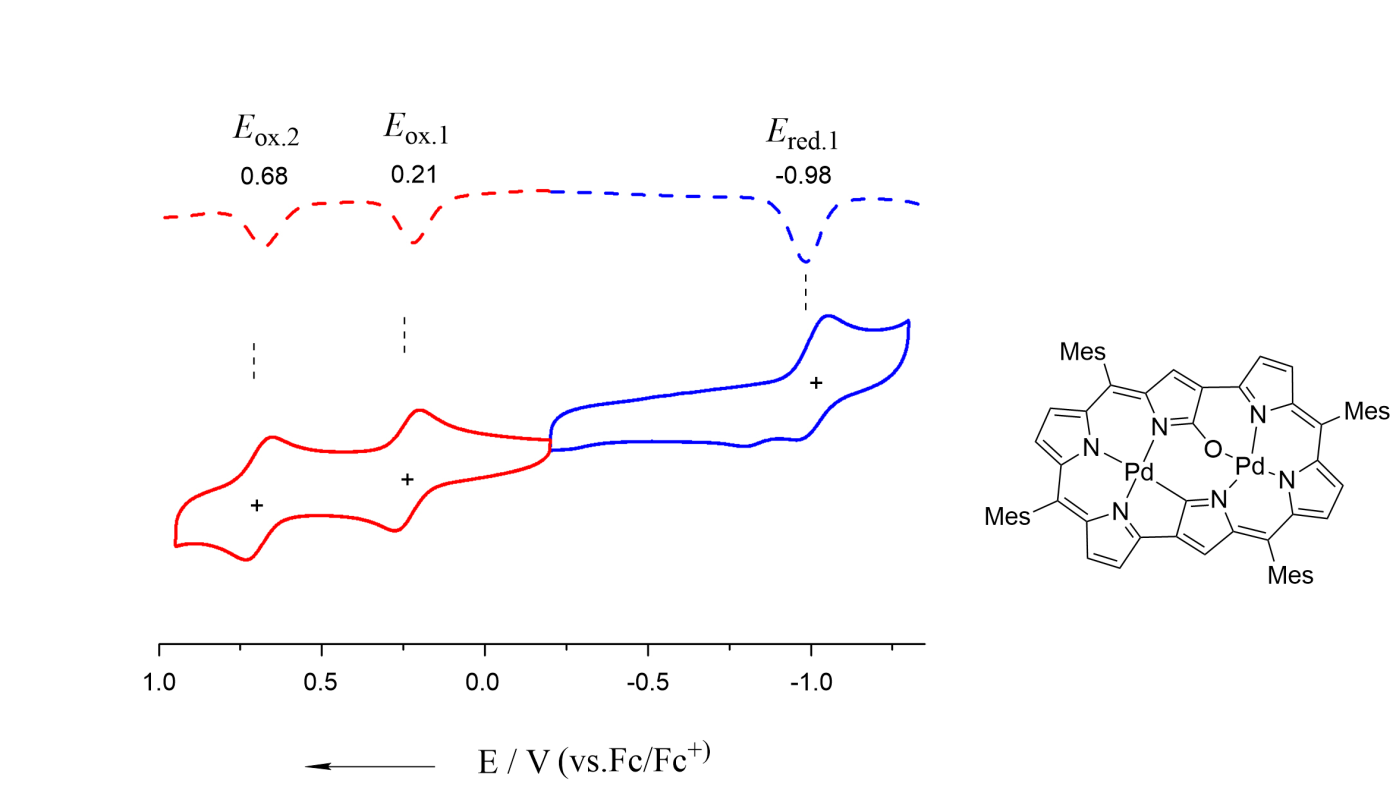


**Supplementary Figure 31**. Cyclic voltammogram and differential-pulse voltammogram of **9Pd**.


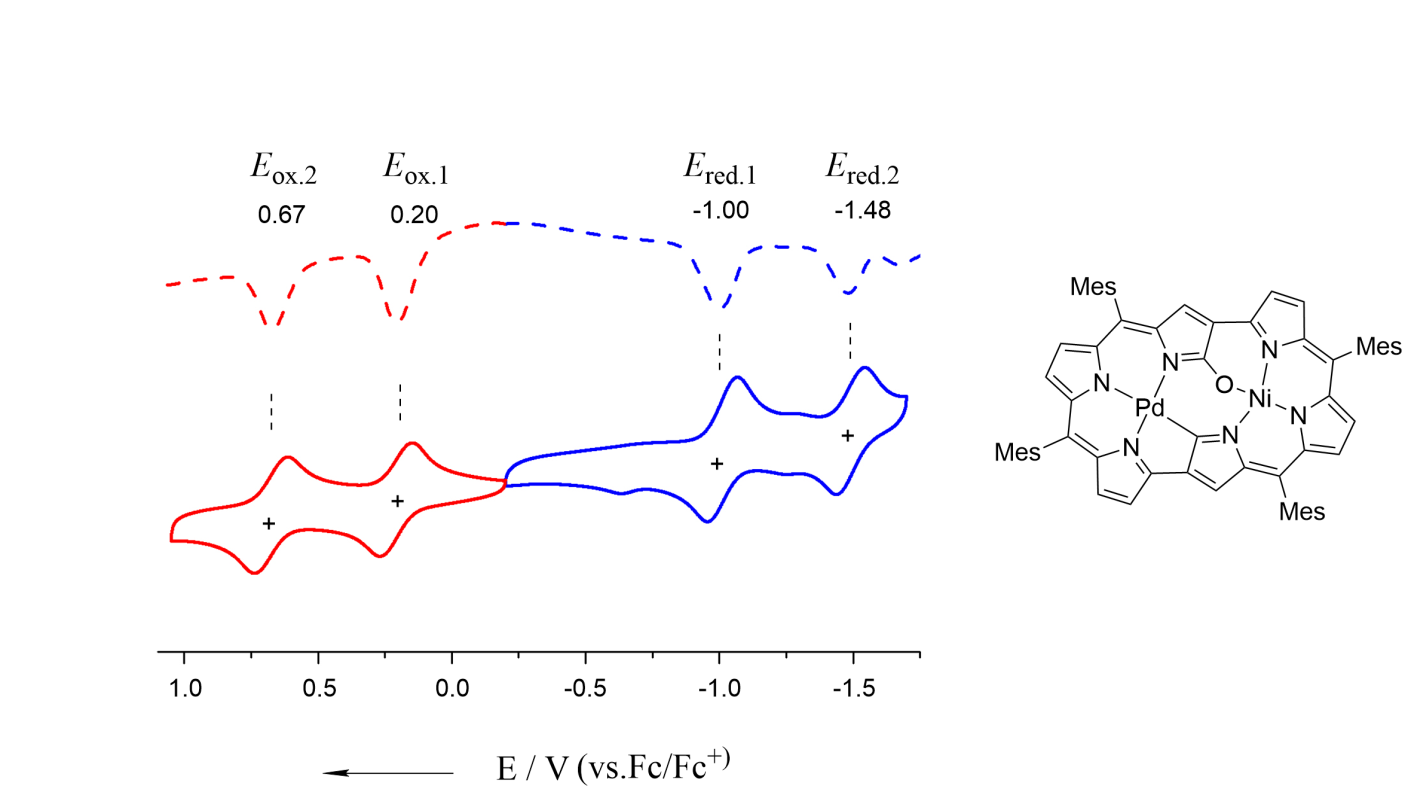


**Supplementary Figure 32**. Cyclic voltammogram and differential-pulse voltammogram of **9Ni**.

**
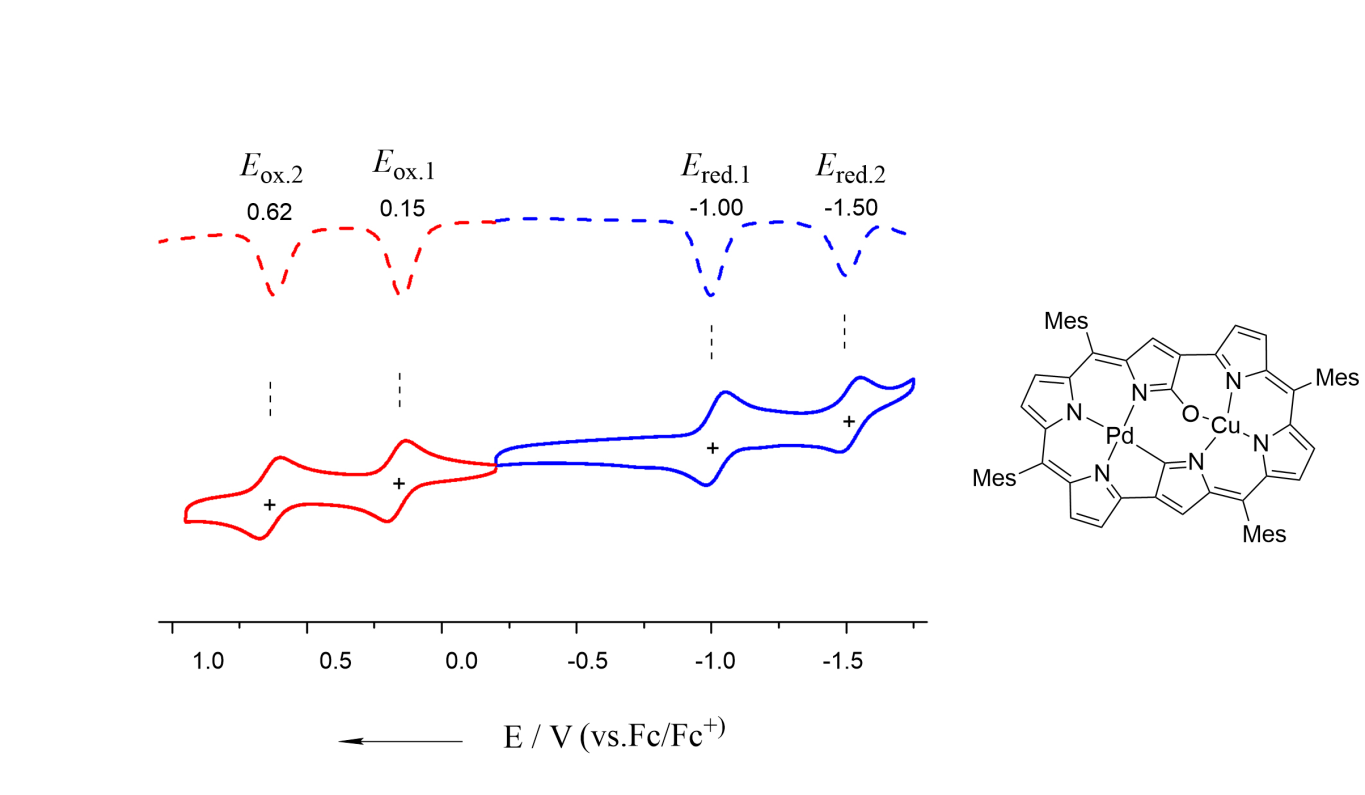
**

**Supplementary Figure 33**. Cyclic voltammogram and differential-pulse voltammogram of **9Cu**.

**Supplementary Figure 34**. Cyclic voltammogram and differential-pulse voltammogram of **10**.





**Supplementary Figure 35**. Cyclic voltammogram and differential-pulse voltammogram of **12**.

**Supplementary Table 1.** Redox potentials and electrochemical HOMO–LUMO gaps

| sample | *E*Ox3 [V] | *E*Ox2 [V] | *E*Ox1 [V] | *E*Red1 [V] | *E*Red2 [V] | *E*Red3 [V] | *E* [eV][a] |
| --- | --- | --- | --- | --- | --- | --- | --- |
| **8** |  | 0.65 | 0.18 | -1.05 | -1.52 | -1.79 | 1.23 |
| **9** |  | 0.63 | 0.18 | -0.94 | -1.52 |  | 1.12 |
| **9Pd** |  | 0.68 | 0.21 | -0.98 |  |  | 1.19 |
| **9Ni** |  | 0.67 | 0.20 | -1.00 | -1.48 |  | 1.20 |
| **9Cu** |  | 0.62 | 0.15 | -1.00 | -1.50 |  | 1.15 |
| **10** | 0.75 | 0.31 | 0.15 | -1.06 |  |  | 1.21 |
| **12** |  | 0.68 | 0.24 | -1.74 |  |  | 1.98 |

[a] *E* = e(*E*ox1-*E*red1), that is, electrochemical HOMO–LUMO gaps.

**X-Ray Crystal** **Data**

**Supplementary Table 2.** Crystal data and refinement results for compound **6**.

Identification code exp_1242

Empirical formula C49H43N3O

Formula weight 689.43

Temperature 100.01(10) K

Wavelength 1.54184 Å

Crystal system Monoclinic

Space group C 1 c 1

Unit cell dimensions a = 19.2386(5) Å = 90°.

b = 14.0313(3) Å = 95.628(2)°.

c = 15.2313(4) Å  = 90°.

Volume 4091.76(18) Å3

Z 4

Density (calculated) 1.314 Mg/m3

Absorption coefficient 2.353 mm-1

F(000) 1696

Crystal size 0.1 x 0.1 x 0.05 mm3

Theta range for data collection 3.906 to 66.595°.

Index ranges -21<=h<=22, -16<=k<=16, -16<=l<=18

Reflections collected 7244

Independent reflections 4376 [R(int) = 0.0351]

Completeness to theta = 66.595° 100.0 %

Absorption correction Semi-empirical from equivalents

Max. and min. transmission 1.00000 and 0.75763

Refinement method Full-matrix least-squares on F2

Data / restraints / parameters 4376 / 131 / 520

Goodness-of-fit on F2 1.021

Final R indices [I>2sigma(I)] R1 = 0.0734, wR2 = 0.1932

R indices (all data) R1 = 0.0759, wR2 = 0.1978

Absolute structure parameter 0.03(3)

Extinction coefficient n/a

Largest diff. peak and hole 0.813 and -0.879 e.Å-3

CCDC 2239867





**Supplementary Figure 36**. X-ray crystal structure of **6**. (a) Top view and (b) side view. The thermal ellipsoids are 30% probability level.

**Supplementary Table 3.** Crystal data and refinement results for compound **7**.

Identification code exp_1658

Empirical formula C49H43N3O2Pd

Formula weight 812.24

Temperature 99.9(2) K

Wavelength 1.54184 Å

Crystal system Orthorhombic

Space group Iba2

Unit cell dimensions a = 34.2146(5) Å = 90°.

b = 15.9294(2) Å = 90°.

c = 14.1391(2) Å  = 90°.

Volume 7706.06(18) Å3

Z 8

Density (calculated) 1.400 Mg/m3

Absorption coefficient 4.232 mm-1

F(000) 3360

Crystal size 0.1 x 0.1 x 0.1 mm3

Theta range for data collection 2.583 to 66.568°.

Index ranges -40<=h<=40, -18<=k<=18, -16<=l<=11

Reflections collected 24293

Independent reflections 5342 [R(int) = 0.0311]

Completeness to theta = 66.568° 100.0 %

Absorption correction Semi-empirical from equivalents

Max. and min. transmission 1.00000 and 0.67272

Refinement method Full-matrix least-squares on F2

Data / restraints / parameters 5342 / 1 / 503

Goodness-of-fit on F2 1.038

Final R indices [I>2sigma(I)] R1 = 0.0233, wR2 = 0.0576

R indices (all data) R1 = 0.0256, wR2 = 0.0586

Absolute structure parameter -0.029(5)

Extinction coefficient n/a

Largest diff. peak and hole 0.307 and -0.468 e.Å-3

CCDC 2239868





**Supplementary Figure 37**. X-ray crystal structure of **7**. (a) Top view and (b) side view. The thermal ellipsoids are 30% probability level.

**Supplementary Table 4.** Crystal data and refinement results for compound **8**.

Identification code exp_1335

Empirical formula C64H54N6Pd2

Formula weight 1120.25

Temperature 100.01(10) K

Wavelength 1.54184 Å

Crystal system Monoclinic

Space group P 1 21/c 1

Unit cell dimensions a = 15.5926(4) Å = 90°.

b = 11.3061(3) Å = 104.232(3)°.

c = 16.9999(5) Å  = 90°.

Volume 2904.95(15) Å3

Z 2

Density (calculated) 1.553 Mg/m3

Absorption coefficient 7.907 mm-1

F(000) 1376

Crystal size 0.1 x 0.1 x 0.02 mm3

Theta range for data collection 2.924 to 66.596°.

Index ranges -18<=h<=18, -13<=k<=12, -20<=l<=9

Reflections collected 10579

Independent reflections 5136 [R(int) = 0.0496]

Completeness to theta = 66.596° 99.9 %

Absorption correction Semi-empirical from equivalents

Max. and min. transmission 1.00000 and 0.65999

Refinement method Full-matrix least-squares on F2

Data / restraints / parameters 5136 / 0 / 367

Goodness-of-fit on F2 1.028

Final R indices [I>2sigma(I)] R1 = 0.0513, wR2 = 0.1299

R indices (all data) R1 = 0.0639, wR2 = 0.1406

Extinction coefficient n/a

Largest diff. peak and hole 1.904 and -1.056 e.Å-3

CCDC 2239869





**Supplementary Figure 38**. X-ray crystal structure of **8**. (a) Top view and (b) side view. The thermal ellipsoids are 30% probability level.

**Supplementary Table 5.** Crystal data and refinement results for compound **8a**.

Identification code exp_2204_sq

Empirical formula C64 H53 Br N6 Pd2

Formula weight 1198.83

Temperature 100.01(10) K

Wavelength 1.54184 Å

Crystal system Monoclinic

Space group P 1 21/c 1

Unit cell dimensions a = 15.7666(5) Å = 90°.

b = 13.1945(3) Å = 114.654(3)°.

c = 15.9606(5) Å  = 90°.

Volume 3017.65(16) Å3

Z 2

Density (calculated) 1.319 Mg/m3

Absorption coefficient 5.900 mm-1

F(000) 1212

Crystal size 0.2 x 0.1 x 0.1 mm3

Theta range for data collection 3.084 to 66.599°.

Index ranges -17<=h<=18, -14<=k<=15, -18<=l<=16

Reflections collected 10417

Independent reflections 5344 [R(int) = 0.0434]

Completeness to theta = 66.599° 100.0 %

Absorption correction Semi-empirical from equivalents

Max. and min. transmission 1.00000 and 0.34266

Refinement method Full-matrix least-squares on F2

Data / restraints / parameters 5344 / 6 / 340

Goodness-of-fit on F2 1.079

Final R indices [I>2sigma(I)] R1 = 0.0516, wR2 = 0.1434

R indices (all data) R1 = 0.0591, wR2 = 0.1513

Extinction coefficient n/a

Largest diff. peak and hole 1.119 and -0.889 e.Å-3

CCDC 2239872





**Supplementary Figure 39**. X-ray crystal structure of **8a**. (a) Top view and (b) side view. The thermal ellipsoids are 30% probability level.

**Supplementary Table 6.** Crystal data and refinement results for compound **8b**.

Identification code exp_2202

Empirical formula C64H52Br2N6Pd2

Formula weight 1278.07

Temperature 100.01(10) K

Wavelength 1.54184 Å

Crystal system Monoclinic

Space group P 1 21/c 1

Unit cell dimensions a = 15.5587(8) Å = 90°.

b = 13.3543(5) Å = 113.942(6)°.

c = 15.9419(8) Å  = 90°.

Volume 3027.3(3) Å3

Z 2

Density (calculated) 1.664 Mg/m3

Absorption coefficient 9.146 mm-1

F(000) 1512

Crystal size 0.3 x 0.2 x 0.1 mm3

Theta range for data collection 3.108 to 66.589°.

Index ranges -12<=h<=18, -15<=k<=9, -18<=l<=18

Reflections collected 9953

Independent reflections 5338 [R(int) = 0.0424]

Completeness to theta = 66.589° 99.9 %

Absorption correction Semi-empirical from equivalents

Max. and min. transmission 1.00000 and 0.11955

Refinement method Full-matrix least-squares on F2

Data / restraints / parameters 5338 / 0 / 386

Goodness-of-fit on F2 1.013

Final R indices [I>2sigma(I)] R1 = 0.0648, wR2 = 0.1691

R indices (all data) R1 = 0.0695, wR2 = 0.1751

Extinction coefficient n/a

Largest diff. peak and hole 2.452 and -1.613 e.Å-3

CCDC 2239870





**Supplementary Figure 40**. X-ray crystal structure of **8b**. (a) Top view and (b) side view. The thermal ellipsoids are 30% probability level.

**Supplementary Table 7.** Crystal data and refinement results for compound **9**.

Identification code exp_2188_sq_sq

Empirical formula C64 H56 N6 O Pd

Formula weight 1031.54

Temperature 100.01(16) K

Wavelength 1.54184 Å

Crystal system Monoclinic

Space group P 1 21/c 1

Unit cell dimensions a = 15.8106(14) Å = 90°.

b = 11.2102(10) Å = 105.385(11)°.

c = 17.812(3) Å  = 90°.

Volume 3043.8(6) Å3

Z 2

Density (calculated) 1.126 Mg/m3

Absorption coefficient 2.782 mm-1

F(000) 1072

Crystal size 0.2 x 0.2 x 0.1 mm3

Theta range for data collection 2.899 to 66.587°.

Index ranges -18<=h<=15, -6<=k<=13, -16<=l<=21

Reflections collected 10376

Independent reflections 5374 [R(int) = 0.0436]

Completeness to theta = 66.587° 99.9 %

Absorption correction Semi-empirical from equivalents

Max. and min. transmission 1.00000 and 0.53974

Refinement method Full-matrix least-squares on F2

Data / restraints / parameters 5374 / 77 / 377

Goodness-of-fit on F2 1.054

Final R indices [I>2sigma(I)] R1 = 0.0898, wR2 = 0.2573

R indices (all data) R1 = 0.1190, wR2 = 0.2816

Extinction coefficient n/a

Largest diff. peak and hole 0.338 and -0.462 e.Å-3

CCDC 2239871





**Supplementary Figure 41**. X-ray crystal structure of **9**. (a) Top view and (b) side view. The thermal ellipsoids are 30% probability level.

**Supplementary Table 8.** Crystal data and refinement results for compound **10**.

Identification code exp_2635_sq

Empirical formula C128 H106 N12 Pd4

Formula weight 2237.84

Temperature 99.9(4) K

Wavelength 1.54184 Å

Crystal system Triclinic

Space group P-1

Unit cell dimensions a = 15.9679(12) Å = 71.862(7)°.

b = 20.0928(15) Å = 71.330(7)°.

c = 24.0357(17) Å  = 86.857(6)°.

Volume 6934.2(10) Å3

Z 2

Density (calculated) 1.072 Mg/m3

Absorption coefficient 4.455 mm-1

F(000) 2284

Crystal size 0.3 x 0.2 x 0.05 mm3

Theta range for data collection 2.041 to 66.600°.

Index ranges -12<=h<=19, -23<=k<=23, -28<=l<=28

Reflections collected 47399

Independent reflections 24470 [R(int) = 0.1167]

Completeness to theta = 66.600° 100.0 %

Absorption correction Semi-empirical from equivalents

Max. and min. transmission 1.00000 and 0.25443

Refinement method Full-matrix least-squares on F2

Data / restraints / parameters 24470 / 0 / 1321

Goodness-of-fit on F2 0.960

Final R indices [I>2sigma(I)] R1 = 0.0861, wR2 = 0.2075

R indices (all data) R1 = 0.1358, wR2 = 0.2438

Extinction coefficient n/a

Largest diff. peak and hole 1.459 and -1.054 e.Å-3

CCDC 2239873





**Supplementary Figure 42**. X-ray crystal structure of **10**. (a) Top view and (b) side view. The thermal ellipsoids are 30% probability level.

**Supplementary Table 9.** Crystal data and refinement results for compound **12**.

Identification code exp_2776_sq

Empirical formula C188 H194 N14 Ni2 Pd2

Formula weight 2979.78

Temperature 101(1) K

Wavelength 1.54184 Å

Crystal system Triclinic

Space group P-1

Unit cell dimensions a = 14.3028(4) Å = 100.119(2)°.

b = 17.0485(5) Å = 108.070(2)°.

c = 22.8204(6) Å  = 103.957(2)°.

Volume 4941.1(2) Å3

Z 1

Density (calculated) 1.001 Mg/m3

Absorption coefficient 2.011 mm-1

F(000) 1568

Crystal size 0.3 x 0.3 x 0.1 mm3

Theta range for data collection 2.775 to 66.601°.

Index ranges -17<=h<=15, -20<=k<=20, -18<=l<=27

Reflections collected 33318

Independent reflections 17419 [R(int) = 0.0765]

Completeness to theta = 66.601° 99.9 %

Absorption correction Semi-empirical from equivalents

Max. and min. transmission 1.00000 and 0.72912

Refinement method Full-matrix least-squares on F2

Data / restraints / parameters 17419 / 66 / 982

Goodness-of-fit on F2 1.065

Final R indices [I>2sigma(I)] R1 = 0.1079, wR2 = 0.2857

R indices (all data) R1 = 0.1182, wR2 = 0.2932

Extinction coefficient n/a

Largest diff. peak and hole 2.041 and -0.942 e.Å-3

CCDC 2239874





**Supplementary Figure 43**. X-ray crystal structure of **12**. (a) Top view and (b) side view. The thermal ellipsoids are 30% probability level. *Meso*-substituents of porphyrin parts are omitted for clarity.

**DFT Calculation**

All calculations were carried out using the Gaussian 09 program.[1] All structures were fully optimized without any symmetry restriction. All geometries were optimized with the crystal structures as the starting structure at the density functional theory (DFT) method with restricted B3LYP (Becke’s three parameter hybrid exchange functionals and the Lee-Yang-Parr correlation functional) level,[2,3] employing 6-311G(d) basis set. Additionally, in order to quantify the impact of the geometric change on aromaticity, the nucleus independent chemical shifts (NICS) values were obtained with the GIAO method based on the final optimized structures. Results for NICS(0) were collected.

| **Wavelength (nm)** | **Oscillator Strengths** | **Major Transitions** |
| --- | --- | --- |
| 574 | 0.0956 | HOMO→LUMO (58.3%); HOMO→LUMO+1 (18.1%); HOMO-1→LUMO+1 (15.2%); HOMO-1→LUMO (8.3%) |
| 568 | 0.085 | HOMO→LUMO+1 (54.3%); HOMO→LUMO (22.0%); HOMO-1→LUMO (19.1%) |
| 390 | 1.2783 | HOMO-1→LUMO (69.8%); HOMO→LUMO+1 (27.3%) |
| 387 | 0.9157 | HOMO-1→LUMO+1 (77.2%); HOMO→LUMO (19.7%) |
| 339 | 0.0306 | HOMO→LUMO+2 (84.5%); HOMO-3→LUMO+1 (5.8%) |
| 335 | 0.0197 | HOMO-8→LUMO (37.7%); HOMO-3→LUMO+1 (13.3%); HOMO-13→LUMO (12.0%); HOMO-2→LUMO+1 (8.4%) |
| 316 | 0.0683 | HOMO-6→LUMO+1 (49.2%); HOMO-7→LUMO (20.2%); HOMO→LUMO+3 (5.8%); HOMO-8→LUMO+1 (5.6%) |
| 314 | 0.0569 | HOMO-6→LUMO (53.8%); HOMO-7→LUMO+1 (10.9%); HOMO-8→LUMO (9.6%); HOMO→LUMO+3 (6.6%) |
| 303 | 0.0269 | HOMO-8→L+1 (23.9%); HOMO-6→L+1 (18.3%); HOMO-7→L (15.1%); HOMO→LUMO+7 (8.6%) |

**Supplementary Figure 44**. Calculated vertical transitions and major transitions of **6**.

| **Wavelength (nm)** | **Oscillator Strengths** | **Major Transitions** |
| --- | --- | --- |
| 699 | 0.0388 | HOMO→LUMO+1 (68.5%); HOMO-1→LUMO (27.4%) |
| 615 | 0.0574 | HOMO-1→LUMO (35.8%); HOMO-2→LUMO (34.0%); HOMO-3→LUMO (16.2%); HOMO→LUMO+1 (11.3%) |
| 539 | 0.2547 | HOMO-2→LUMO (52.5%); HOMO→LUMO+1 (15.0%); HOMO-1→LUMO (14.5%); HOMO-3→LUMO (7.4%) |
| 518 | 0.1448 | HOMO-3→LUMO (63.3%); HOMO-1→LUMO (18.3%); HOMO→LUMO+2 (11.6%) |
| 471 | 0.2227 | HOMO→LUMO+2 (57.4%); HOMO-4→LUMO+1 (23.2%); HOMO-3→LUMO (7.1%); HOMO-6→LUMO+1 (5.8%) |
| 422 | 0.2866 | HOMO-4→LUMO+1 (53.3%); HOMO-6→LUMO+1 (14.7%); HOMO-16→LUMO (9.3%); HOMO→LUMO+2 (8.2%) |
| 421 | 0.0163 | HOMO-14→LUMO (89.4%) |
| 385 | 0.0696 | HOMO-6→LUMO+1 (60.3%); HOMO-16→LUMO (30.1%) |
| 381 | 1.1403 | HOMO-16→LUMO (54.1%); HOMO-6→LUMO+1 (12.9%); HOMO→LUMO+2 (12.3%); HOMO-4→LUMO+1 (7.0%) |
| 361 | 0.0561 | HOMO-18→LUMO (91.0%) |
| 339 | 0.0464 | HOMO-4→LUMO+2 (81.3%); HOMO-2→LUMO+3 (7.1%) |
| 326 | 0.1578 | HOMO-1→LUMO+3 (76.5%); HOMO-17→LUMO+1 (7.9%) |

**Supplementary Figure 45**. Calculated vertical transitions and major transitions of **8**.

| **Wavelength (nm)** | **Oscillator Strengths** | **Major Transitions** |
| --- | --- | --- |
| 882 | 0.0111 | HOMO-1→LUMO (90.9%) |
| 656 | 0.0122 | HOMO-2→LUMO (57.6%); HOMO→LUMO+1 (34.9%) |
| 596 | 0.1203 | HOMO-4→LUMO (36.1%); HOMO→LUMO+1 (20.7%); HOMO-2→LUMO (18.5%); HOMO→LUMO+2 (18.1%) |
| 581 | 0.0694 | HOMO-4→LUMO (36.6%); HOMO-5→LUMO (34.0%) |
| 542 | 0.0896 | HOMO-5→LUMO (35.2%); HOMO-9→LUMO (17.6%); HOMO-10→LUMO (10.5%); HOMO→LUMO+1 (8.3%) |
| 527 | 0.2788 | HOMO→LUMO+2 (43.3%); HOMO-9→LUMO (9.5%) |
| 514 | 0.1169 | HOMO-1→LUMO+1 (33.2%); HOMO→LUMO+2 1(7.4%); HOMO-5→LUMO (16.1%); HOMO-4→LUMO (6.8%) |
| 504 | 0.1806 | HOMO-1→LUMO+1 (48.1%); HOMO-9→LUMO (10.3%) |
| 483 | 0.0668 | HOMO-11→LUMO (49.9%); HOMO-13→LUMO (14.8%) |
| 410 | 0.0734 | HOMO→LUMO+3 (59.0%); HOMO-4→LUMO+1 (13.6%) |
| 406 | 0.3246 | HOMO-1→LUMO+2 (29.5%); HOMO-14→LUMO (10.7%); HOMO-3→LUMO+2 (10.2%); HOMO-18→LUMO (10.0%) |
| 369 | 0.6651 | HOMO-4→LUMO+1 (21.0%); HOMO-5→LUMO+1 (17.7%); HOMO-9→LUMO+1 (10.4%); HOMO→LUMO+3 (7.2%) |
| 333 | 0.236 | HOMO-5→LUMO+2 (43.4%); HOMO-22→LUMO (13.3%) |
| 315 | 0.0223 | HOMO-14→LUMO+1 (21.7%); HOMO→LUMO+5 (16.4%); HOMO-24→LUMO (15.0%); HOMO-25→LUMO (10.2%) |

**Supplementary Figure 46**. Calculated vertical transitions and major transitions of **9**.

**Supplementary Figure 47**. Calculated NICS of **8**.

|  | **1** | **2** | **3** | **4** | **5** | **6** | **7** |
| --- | --- | --- | --- | --- | --- | --- | --- |
| **NICS** | 13.2469 | -4.6689 | 14.6965 | -5.7466 | 8.9518 | 13.0151 | 11.5915 |
|  | **8** | **9** | **10** | **11** | **12** | **13** |  |
| **NICS** | -4.5361 | 14.5440 | - 5.6966 | 8.9791 | 11.8668 | 5.4134 |  |

**Supplementary Figure 48**. Calculated NICS of **9**.

|  | **1** | **2** | **3** | **4** | **5** | **6** | **7** |
| --- | --- | --- | --- | --- | --- | --- | --- |
| **NICS** | 20.9202 | -3.7810 | 19.6890 | -1.7119 | 19.6248 | 33.3647 | 24.8369 |
|  | 8 | 9 | 10 | 11 | 12 | 13 | 14 |
| **NICS** | -11.390 | 25.356 | -9.8456 | 17.0684 | 16.6577 | 10.4340 | 13.8865 |

**Supplementary Figure 49**. Calculated NICS of **6**.

|  | **a** | **b** | **c** | **d** | **e** | **f** | **g** | **h** |
| --- | --- | --- | --- | --- | --- | --- | --- | --- |
| **NICS** | -11.9411 | -17.8101 | -13.9625 | -17.5335 | -17.8287 | -14.3612 | -18.1181 | -12.1483 |

[1] Gaussian 09, M. J. Frisch, G. W. Trucks, H. B. Schlegel, G. E. Scuseria, M. A. Robb, J. R. Cheeseman, G. Scalmani, V. Barone, B. Mennucci, G. A. Petersson, H. Nakatsuji, M. Caricato, X. Li, H. P Hratchian, A. F. Izmaylov, J. Bloino, G. Zheng, J. L. Sonnenberg, M. Hada, M. Ehara, K. Toyota, R. Fukuda, J. Hasegawa, M. Ishida, T. Nakajima, Y. Honda, O. Kitao, H. Nakai, T. Vreven, J. A. Montgomery, Jr., J. E. Peralta, F. Ogliaro, M. Bearpark, J. J. Heyd, E. Brothers, K. N. Kudin, V. N. Staroverov, R. Kobayashi, J. Normand, K. Raghavachari, A. Rendell, J. C. Burant, S. S. Iyengar, J. Tomasi, M. Cossi, N. Rega, J. M. Millam, M. Klene, J. E. Knox, J. B. Cross, V. Bakken, C. Adamo, J. Jaramillo, R. Gomperts, R. E. Stratmann, O. Yazyev, A. J. Austin, R. Cammi, C. Pomelli, J. W. Ochterski, R. L. Martin, K. Morokuma, V. G. Zakrzewski, G. A. Voth, P. Salvador, J. J. Dannenberg, S. Dapprich, A. D. Daniels, O. Farkas, J. B. Foresman, J. V. Ortiz, J. Cioslowski, and D. J. Fox Gaussian, Inc., Wallingford CT, 2009.

[2] A. D. Becke, *J. Chem. Phys.* **1993**, *98*, 1372-1377.

[3] C. Lee, W. Yang and R. G. Parr, *Phys. Rev. B* **1998**, *37*, 785-789.
